# Supplementary material
Source: publisher site journal article supplement (https://static.cambridge.org/content/id/urn:cambridge.org:id:article:S0079497X19000124/resource/name/S0079497X19000124supp001.xlsx)
Supplement: Supplementary file 1 [file S0079497X19000124supp001.xlsx]

## Sheet: Supplementary Data Description
Supplementary Data 1	Site data for archaeobotanical evidence
Supplementary Data 2	Summary of archaeobotanical evidence
Supplementary Data 3	Weed seed data
Supplementary Data 4	Information on sites and contexts selected for stable isotope analysis of Early Neolithic cereal grains
Supplementary Data 5	Stable isotope results for Early Neolithic cereal grains

## Sheet: Supplementary Data Table S1
Neolithic Farming and Wild Plant Exploitation in Western Britain: Archaeobotanical and Crop Stable Isotope Evidence from Wales (c. 4000–2200 cal BC)
By EDWARD R. TREASURE, DARREN R. GRÖCKE, ASTRID E. CASELDINE3and MIKE J. CHURCH
Table S1
Site Name	Site Number	Area	Latitude	Longitude	Period	Dating Evidence	Quality of Dating Evidence	Site Type	Feature Type(s) Sampled	Site Report Published	Archaeobotanical Report Published	Excavation Date	Publication Date	Summary of plant remains present	Comments	Comments2	Reference(s)	Full Reference (I)	Full Reference (II)	Full Reference (III)
Berry Hill	1	South-West	52.0204	-4.81597	Middle-Late Neolithic	C14	1	Hearth	?Hearth/Area of burning	Yes	Yes	2007	2012	No charred plant remains recovered? Unclear if plant remains were present or not.	One C14 date on ?hearth: 3100-2880 cal BC (4330 ± 50 BP; Beta-53725), hazel charcoal		Caseldine and Griffiths 2012	Caseldine, A.E. & Griffiths 2012. Archaeobotanical Evidence, pp.297–8 in K. Murphy & H. Mytum, Iron Age Enclosed Settlements in West Wales. Proceedings of the Prehistoric Society 78, 263–313.
Bolton Hill Quarry (1)	2	South-West	51.763644	-5.02159	Later Mesolithic-Early Neolithic	C14	1	Pit	Pit	No	No	2009	n/a	No charred plant remains recovered? (Report states plant remains present in pit fill, however, no further information given).	Two C14 dates obtained on one pit: 4040-3800 cal BC (5135 ± 40 BP; SUERC-30122), oak charcoal 4150-3950 cal BC (5200 ± 40 BP; SUERC-30336), oak charcoal		Johnson and Tinsley 2010; McKenna 2010	Johnson, B. & Tinsley, A. 2010. Archaeological Excavations at Bolton Hill Quarry, Pembrokeshire. Unpublished Report. Archaeological Research Services Ltd Report 2010/50.	McKenna, R. 2010. Plant Macrofossil and Charcoal Assessment of samples from Bolton Hill Quarry, Pembrokeshire. Unpublished Report. Birmingham Archaeo-Environmental Report 2047.
Bolton Hill Quarry (2)	3	South-West	51.7636	-5.02159	Early Neolithic	C14	1	Pit	Pit	No	No	2009	n/a	No charred plant remains recovered?	Two C14 dates obtained on one pit: 3630-3360 cal BC (4680 ± 40 BP; SUERC-30127), alder charcoal 3630-3360 cal BC (4675 ± 40 BP; SUERC-30128), alder charcoal		Johnson and Tinsley 2010; McKenna 2010	Johnson, B. & Tinsley, A. 2010. Archaeological Excavations at Bolton Hill Quarry, Pembrokeshire. Unpublished Report. Archaeological Research Services Ltd Report 2010/50.	McKenna, R. 2010. Plant Macrofossil and Charcoal Assessment of samples from Bolton Hill Quarry, Pembrokeshire. Unpublished Report. Birmingham Archaeo-Environmental Report 2047.
Bolton Hill Quarry (3)	4	South-West	51.7636	-5.02159	Middle Neolithic	Pottery; C14	2	Pit Group	Pits	No	No	2009	n/a	Charred plant remains (common). Hazel nutshell +++ Weed seeds and other +	Two C14 dates obtained on one pit: 3340-2920 cal BC (4440 ± 40 BP; SUERC-30113), hazel nutshell 3500-3110 cal BC (4575 ± 40 BP; SUERC-30117), alder charcoal Two C14 dates obtained on one pit: 3490-3100 cal BC (4555 ± 40 BP; SUERC-30117), hazel nutshell 3500-3100 cal BC (4560 ± 40 BP; SUERC-30118), hazel nutshell Peterborough pottery also present.		Johnson and Tinsley 2010; McKenna 2010	Johnson, B. & Tinsley, A. 2010. Archaeological Excavations at Bolton Hill Quarry, Pembrokeshire. Unpublished Report. Archaeological Research Services Ltd Report 2010/50.	McKenna, R. 2010. Plant Macrofossil and Charcoal Assessment of samples from Bolton Hill Quarry, Pembrokeshire. Unpublished Report. Birmingham Archaeo-Environmental Report 2047.
Bolton Hill Quarry (4)	5	South-West	51.7636	-5.02159	Late Neolithic-Early Bronze Age (Beaker period)	Pottery; C14	1	Pit	Pit	No	No	2009	n/a	Charred plant remains (rare). Cereal grains (+) (naked wheat, indet cereal) Weed seeds and other +	One date on pit: 2440-2130 cal BC (3805 ± 40 BP; SUERC-30120), naked wheat grain Beaker pottery present in pit. Adjacent pit probably associated. Early date for naked wheat grain, secure identification?		Johnson and Tinsley 2010; McKenna 2010	Johnson, B. & Tinsley, A. 2010. Archaeological Excavations at Bolton Hill Quarry, Pembrokeshire. Unpublished Report. Archaeological Research Services Ltd Report 2010/50.	McKenna, R. 2010. Plant Macrofossil and Charcoal Assessment of samples from Bolton Hill Quarry, Pembrokeshire. Unpublished Report. Birmingham Archaeo-Environmental Report 2047.
Bolton Hill Quarry (5)	6	South-West	51.7636	-5.02159	Late Neolithic-Early Bronze Age (Beaker period)	Pottery; C14	1	Pit	Pit	No	No	2009	n/a	Charred plant remains (occasional). Hazel nutshell (+) Weed seeds and other ++	Two C14 dates on pit: 2280-1980 cal BC (3715 ± 40 BP; SUERC-30138), hazel nutshell 2460-2130 cal BC (3810 ± 40 BP; SUERC-30139), hazel nutshell Grooved Ware pottery present. Possible that this pit dates to the Early Bronze Age and is associated with surrounding pits and stake-holes.		Johnson and Tinsley 2010; McKenna 2010	Johnson, B. & Tinsley, A. 2010. Archaeological Excavations at Bolton Hill Quarry, Pembrokeshire. Unpublished Report. Archaeological Research Services Ltd Report 2010/50.	McKenna, R. 2010. Plant Macrofossil and Charcoal Assessment of samples from Bolton Hill Quarry, Pembrokeshire. Unpublished Report. Birmingham Archaeo-Environmental Report 2047.
Borras Quarry (1)	7	North-East	53.073	-2.96118	Early Neolithic	Pottery; C14	2	Pit Group	Pits	No	No	2011	n/a	Charred plant remains (abundant). Hazel nutshell ++++ Cereal grains ++ (indet cereal, wheat) Crab apple (+) Weed seeds and other (+)	Archaeological investigations ongoing. Preliminary phasing of deposits. ENeo C14 dates obtained.		Archaeological Services Durham University 2010, 2013; Grant 2011	Archaeological Services Durham University 2010. Borras Quarry, Wrexham. Palaeoenvironmental analysis. Unpublished Report. Archaeological Services Durham Univeristy Report 2450.	Archaeological Services Durham University 2013. 2011 Excavation Borras Quarry, Wrexham. Palaeoenvironmental analysis. Unpublished Report. Archaeological Servies Durham University Report 2988.	Grant, I. & Jones, N.W. 2011. Borras Quarry, Wrexham. Archaeological Watching Brief and Excavation 2011. Unpublished Report. Clwyd Powys Archaeological Trust Report 1117.
Borras Quarry (2)	8	North-East	53.073	-2.96118	Middle Neolithic	Pottery; C14	2	Pit Group	Pits	No	No	2011	n/a	Charred plant remains (abundant). Hazel nutshell ++++ Weed seeds and other +	Numerous Middle Neolithic features grouped together (pits, earth ovens). Archaeological investigations ongoing. Preliminary phasing of deposits. MNeo C14 dates obtained. Peterborough pottery present.		Archaeological Services Durham University 2010, 2013; Grant 2011	Archaeological Services Durham University 2013. 2011 Excavation Borras Quarry, Wrexham. Palaeoenvironmental analysis. Unpublished Report. Archaeological Services Durham University Report 2988.	Archaeological Services Durham University 2013. 2011 Excavation Borras Quarry, Wrexham. Palaeoenvironmental analysis. Unpublished Report. Archaeological Servies Durham University Report 2988.	Grant, I. & Jones, N.W. 2011. Borras Quarry, Wrexham. Archaeological Watching Brief and Excavation 2011. Unpublished Report. Clwyd Powys Archaeological Trust Report 1117.
Bryn Bachau	9	North-West	52.9087	-4.33219	Late Neolithic-Early Bronze Age (Beaker period)	C14	2	Burnt Mound	Burnt Mound	No	No	2004-2005	2007	No charred plant remains recovered.	One C14 date from the burnt mound: 2570-2140 cal BC (3870 ± 70 BP; Beta-204432), hazel and oak charcoal One C14 date on pit associated with burnt mound. 2580-1920 cal BC (3810 ± 120 BP; Beta-204434), hazel and oak charcoal		Akeret 2007	Akeret, Ö. 2007. Appendix 8: Palaeobotanical Report, pp.77-81 in A. Davidson, G. Smith and J. Roberts, Archaeological Excavation and Recording During the A497 Road Improvement Scheme, Gwynedd. Archaeological Evaluation, Excavation and Watching Brief. Unpublished Report. Gwynedd Archaeological Trust Report 625.
Buttington Cross	10	Central	52.6716	-3.12094	Late Neolithic-Early Bronze Age (Beaker period)	Pottery; C14	2	Pit Group?	Pit	No	No	2006	n/a	Charred plant remains (abundant). Hazel nutshell ++++ Creal grains + (indet cereal, hulled barley, wheat) Cereal chaff (+) (emmer wheat) Flax (+)	Possibility that some material is intrusive. Large cereal assemblage recovered from eary medieval corn driers. One C14 date from pit (contains cereal assemblage): 2340-2140 cal BC (3795 ± 30 BP; SUERC-24179), hazel nutshell Pit containing flax not C14 dated		Clapham 2009	Clapham, A. 2009. Plant macrofossil analysis, pp.31-36 in A. Mann and D. Hurst, Buttington Cross, Welshpool, Powys, Wales. A Bronze Age Barrow and Post-Roman Grain Processing Site. Unpublished Report. Historic Environment and Archaeology Service, Worcestershire County Council Report 1714.
Capel Eithin (3)	11	North-West	53.2298	-4.26511	Late Neolithic	Pottery; C14	4	Pit Group?	Pits	Yes	No	1978; 1980-1981	1999	Charred plant remains (abundant). Hazel nutshell Cereal grains ++++ (indet cereal, hulled barley, naked barley, barley, wheat, emmer wheat, naked wheat, oat, rye) Cereal chaff (+) (emmer wheat, oat) Celtic bean (+) Bramble (+) Prunus sp. (+) Weed seeds and other ++	2840-2200 cal BC (3950 ± 70 BP; CAR-446), charcoal 2140-1740 cal BC (3580 ± 70 BP: CAR-447), charcoal. Grooved Ware pottery present. There are potential problems with radiocarbon dates from this site.	Pit Group containing Grooved Ware pottery. The are potential problems with the radiocarbon dates from this site (?contamination), since they do not agree in many cases with pottery dating evidence. Possibly evidence for contamination in archaeobotanical assemblage. Later activity at the site includes an Early Bronze Age cemetery, Romano-British structure and Early Medieval Graves. Some of the pit…	Williams 1999; Site Archive	Williams, D. 1999. Plant macrofossils, pp.109–112 in S.I. White & G. Smith, A Funerary and Ceremonial Centre at Capel Eithin, Gaerwen, Anglesey: Excavations of Neolithic, Bronze Age, Roman and Early Medieval Features in 1980 and 1981. Transactions of the Anglesey Antiquarian Society (no Vol. no), 1–179	Gwynedd Museum & Art Gallery, Site Archive.
Carrog (1)	12	North-West	53.398	-4.44101	Early Neolithic	Pottery; C14	3	Pit Group (and structure?)	Pits	Yes	Yes	2010	2014	Charred plant remains (abundant). Hazel nutshell ++++ Cereal grains ++ (indet cereal, barley, hulled barley, wheat, oat) Cereal chaff (+) (emmer wheat) Hawthorn (+) Sloe (+) Weed seeds and other ++	One C14 date obtained on pit (contains cereal assemblage): 3640-3380 cal BC (4750 ± 30 BP; SUERC-33064), hazel charcoal Early Neolithic pottery also present. Early Medieval stake-hole produced rich assemblage of cereals and processing waste; potential for contamination. In addition, some plant remains are considered to be residual within later features.		Caseldine et al. 2014	Caseldine, A.E., Griffiths, C.J. & Peck, I. 2014. Charred plant remains, pp.76–81 in G. Smith, A Late Bronze Age/Early Iron Age Hilltop Enclosure with Evidence for Early and Middle Neolithic and Early Medieval Settlement at Carrog, Llanbadrig, Anglesey. Studia Celtica 168, 55–92.
Carrog (2)	13	North-West	53.398	-4.44101	Middle Neolithic	Pottery; C14	1	Pit	Pit	Yes	Yes	2010	2014	Charred plant remains (common). Hazel nutshell +++ Weed seeds and other +	One C14 date obtained on a pit: 3340-3030 cal BC (4480 ± 35 BP; SUERC-33074), hazel charcoal. Peterborough Ware pottery present.		Caseldine et al. 2014	Caseldine, A.E., Griffiths, C.J. & Peck, I. 2014. Charred plant remains, pp.76–81 in G. Smith, A Late Bronze Age/Early Iron Age Hilltop Enclosure with Evidence for Early and Middle Neolithic and Early Medieval Settlement at Carrog, Llanbadrig, Anglesey. Studia Celtica 168, 55–92.
Cefn Du (1)	14	North-West	53.2262	-4.26273	Later Mesolithic-Early Neolithic	Pottery; C14	4	Pit Group	Pits	Yes	No	1999	n/a	No charred plant remains recovered.	Flots assessed only. Residues not assessed. One C14 date obtained on a pit: 4230-3790 cal BC (5169 ± 57 BP; Wk9280), charcoal		Smith 1999; Cutler 2012	Smith, W. 1999. Charred plant remains, in G. Hughes (ed.), A55 Anglesey DBFO scheme. Archaeological Investigations. Post-Excavation Assessment and Research Design. Unpublished Report. Birmingham University Field Archaeology Unit Report 578.02	Cuttler, R. 2012. Cefn Du, Gaerwen: a Neolithic pit cluster and Iron Age/Romano-British farmstead. In R. Cuttler, A. Davidson & G. Hughes (eds.), A Corridor Through Time: The Archaeology of the A55 Anglesey Road Sceheme, 5–29. Oxford: Oxbow Books.
Cefn Du (2)	15	North-West	53.2262	-4.26273	Middle-Late Neolithic	Pottery; C14	4	Pit Group	Pits	Yes	No	1999	2012	Charred plant remains. Hazlenut shell Cereal chaff (+) (?wheat rachis)	Flots assessed only. Residues not assessed. Full analysis not undertaken. Peterborough Ware and Grooved Ware present. One C14 date on pit (containing wheat rachis): 3640-3360 cal BC (4698 ± 65 BP; Wk9278), charcoal C14 date is later than pottery dating		Smith 1999; Cutler 2012	Smith, W. 1999. Charred plant remains, in G. Hughes (ed.), A55 Anglesey DBFO scheme. Archaeological Investigations. Post-Excavation Assessment and Research Design. Unpublished Report. Birmingham University Field Archaeology Unit Report 578.02	Cuttler, R. 2012. Cefn Du, Gaerwen: a Neolithic pit cluster and Iron Age/Romano-British farmstead. In R. Cuttler, A. Davidson & G. Hughes (eds.), A Corridor Through Time: The Archaeology of the A55 Anglesey Road Sceheme, 5–29. Oxford: Oxbow Books.
Church Farm Barrow	16	Central	51.4246	-3.55171	Late Neolithic-Early Bronze Age (Beaker period)	C14	1	Cremation? Pyre?	Pyre?	Yes	Yes	2006	2009	Charred plant remains (trace). Hazel nutshell (+) Weed seed and other (+)	One C14 date obtained on charcoal spread: 2570-2290 cal BC (3920 ± 40 BP; Beta-299072), blackthorn charcoal		Caseldine 2009	Caseldine, A.E. & Griffiths, C.J. 2009. Environmental analysis, pp. 26–30 in R. Lewis (ed.), Trial Excavations at the Church Farm Barrow Cemetery, Glamorgan. Studia Celtica 18, 1–36.
Cilsan Mill	17	South-West	51.8787	-4.0498	Late Neolithic	C14	1	Pit	Pit	No	No	2007	n/a	Charred plant remains abundant. Hazel nutshell ++++	Excavated as part of South Wales high pressure gas pipeline scheme. Residue not scanned. One C14 date on pit: 2880-2570 cal BC (4120 ± 30 BP; SUERC-57309), hazel nutshell		Rackham 2014	Rackham, J. 2014. The palaeoenvironmental evidence, pp.8–10 in L. Brannlund. South Wales Gas Pipeline Project. Site 20.18. Archaeological Watching Brief. Unpublished Report. Cotswold Archaeology Report 13269.
Corndon Hill	18	Central	52.5644	-3.03423	Late Neolithic	C14	3	Round Barrow/Buried Soil	Buried Soil/Occupation Layer	Yes	Yes	2008	2008	Charred plant remains (rare). Hazel nutshell + Weed seeds and other +	Two C14 dates on contexts below EBA barrow: 3010-2960 cal BC (4260 ± 40 BP; Beta-254596), alder charcoal 2470-2200 cal BC (3870 ± 40 BP; Beta-2545595), hazel charcoal		Caseldine and Griffiths 2008	Caseldine, A.E. & Griffiths, C.J. 2008. Environmental evidence, pp.20–23 in W.J. Britnell, A.E. Caseldine and C.J. Griffiths, Partial excavation of a Round Barrow on Corndon Hill in 2006. Archaeology in Wales 48, 17–25.
Cwm Meudwy (1)	19	South-West	52.054	-4.33087	Early Neolithic	Pottery; C14	2	Pit Group	Pits	Yes	No	2003	2006	Charred plant remains (abundant). Hazel nutshell ++++ Cereal grains +++ (indet cereal, barley ,wheat, emmer wheat, emmer/spelt wheat, naked wheat, oat) Cereal chaff (+) (wheat) Weed seeds and other ++	Three C14 dates obtained on three pits: 3780-3520 cal BC (4870 ± 50 BP; Beta-185680), hazel charcoal 3710-3520 cal BC (4840 ± 40 BP; Beta-185679), hazel charcoal 3660-3380 cal BC (4800 ± 40 BP; Beta-185678), alder charcoal A further C14 date returned a ?residual ENeo date. Early Neolithic pottery also present. Cereal assemblage present in C14 dated contexts (Beta-185680; Beta-185679)		Caseldine and Griffiths 2006a, 2006b	Caseldine, A.E. & Griffiths, C.J. 2006. The charred plant remains, pp.42–43 in K. Murphy & R.T.J. Evans (eds), Excavation of Neolithic pits, three ring-ditches and a palisaded enclosure at Cwm Meudwy, Llandysul, Ceredigion, 2003. Archaeologia Cambrensis 155, 23–48.	Caseldine, A.E. and Griffiths, C.J. 2006. The Charred Plant Remains from Cwm Meudwy, Llandysul. Unpublished Report. Site Archive.
Cwm Meudwy (2)	20	South-West	52.054	-4.33087	Middle Neolithic	Pottery	4	Pit (Pit Group?)	Pit	Yes	No	2003	2006	Charred plant remains (rare). Hazel nutshell + Cereal grain (+) (indet cereal)	Full archaeobotanical report unpublished. Poorly phased feature and many of the features cannot be phased. Peterborough Ware pottery present in pit fill.		Caseldine and Griffiths 2006a, 2006b	Caseldine, A.E. & Griffiths, C.J. 2006. The charred plant remains, pp.42–43 in K. Murphy & R.T.J. Evans (eds), Excavation of Neolithic pits, three ring-ditches and a palisaded enclosure at Cwm Meudwy, Llandysul, Ceredigion, 2003. Archaeologia Cambrensis 155, 23–48.	Caseldine, A.E. and Griffiths, C.J. 2006. The Charred Plant Remains from Cwm Meudwy, Llandysul. Unpublished Report. Site Archive.
Cwm Meudwy (3)	21	South-West	52.054	-4.33087	Late Neolithic-Early Bronze Age (Beaker period)	Pottery	4	Pit	Pits	Yes	No	2003	2006	Charred plant remains (abundant). hazel nutshell ++++ Weed seeds and other (+)	Late Neolithic or Early Bronze Age pottery present (possibly Grooved Ware).		Caseldine and Griffiths 2006a, b	Caseldine, A.E. & Griffiths, C.J. 2006. The charred plant remains, pp.42–43 in K. Murphy & R.T.J. Evans (eds), Excavation of Neolithic pits, three ring-ditches and a palisaded enclosure at Cwm Meudwy, Llandysul, Ceredigion, 2003. Archaeologia Cambrensis 155, 23–48.	Caseldine, A.E. and Griffiths, C.J. 2006. The Charred Plant Remains from Cwm Meudwy, Llandysul. Unpublished Report. Site Archive.
Cwmifor	22	South-West	51.9108	-3.95705	Early Neolithic	Pottery; C14	3	ENeo Structure? and Pits	ENeo structure (post-holes, layers); Pits	No	No	2007	n/a	Charred plant remains abundant. Hazel nutshell ++++ Cereal grains ++++ (indet cereal, barley, emmer wheat, emmer/spelt wheat) Cereal chaff (+) (emmer wheat) Weed seeds and other +	Excavated as part of South Wales high pressure gas pipeline scheme. Early Neolithic pottery present. Plant remains, possibly of Early Neolithic, date including hazel nutshell and sloe were recovered during an evaluation, however, the dating of these features is unclear. Three C14 dates from post-hole of ?ENeo structure (contains cereal assemblage): 4040-3800 cal BC (Beta-257727; 5130 ± 40 BP), ha…		Rackham 2014; Pannett 2012	Rackham, J. 2014. The palaeoenvironmental evidence, pp.23–49 in A. Barber & J. Hart. South Wales Gas Pipeline Project. Site 26.05. Land West of Cwmifor, Manordeilo and Salem, Camarthenshire. Archaeological Excavation. Unpublished Report. Costwold Archaeology Report 13308.	Pannett, A. 2012. Pits, pots and plant remains: trends in Neolithic deposition in Carmarthenshire, South Wales. In J. Thomas & H. Anderson-Whymark (eds.), Regional Perspectives on Neolithic Pit Deposition: Beyond the Mundane, 126–43. Oxford:Neolithic Studies Group Seminar Papers.
Dyffryn Lane (1)	23	Central Wales	52.6854	-3.17899	Middle Neolithic	Pottery; C14	1	Pit Group	Pits	Yes	No	2006	2010	Charred plant remains (abundant). Hazel nutshell ++++	Six C14 dates obtained on pits. 3350-3030 cal BC (4480 ± 40 BP; Beta-231247), hazel nutshell (pit 11) 3090-2890 cal BC (4340 ± 40 BP; Beta-231248), hazel nutshell (pit 11) 3370-3100 cal BC (4530 ± 40 BP; Beta-236462), hazel nutshell (pit 11) 3100-2880 cal BC (4330 ± 50 BP; Beta-231250), hazel nutshell (pit 36) 3020-2760 cal BC (4280 ± 40 BP; Beta-231250R), hazel nutshell (pit 36) 3350-3030 cal BC…		Caseldine and Griffiths 2007, 2010	Caseldine, A.E. & Griffiths, C.J. 2010. Charred plant remains and charcoal, pp. 241–2 in A. Gibson, Excavation and Survey at Dyffryn Lane Henge Complex, Powys, and a Reconsideraton of the Dating of Henges. Proceedings of the Prehistoric Society 76, 213–48.	Caseldine, A.E. and Griffiths, C.J. 2007. The Charred Plant Remains from Dyffryn Lane. Unpublished Report. Report for Clwyd-Powys Archaeological Trust. University of Wales, Lampeter.
Dyffryn Lane (2)	24	Central	52.6854	-3.17899	Late Neolithic	C14	2	Henge	Ditch fill(s); Areas of Burning; Buried Soils	Yes	No	2006	2010	Charred plant remains (rare). Weed seeds and other +	Difficult to precisely phase samples. Iron Age date obtained from henge ditch-fill. Two C14 dates from buried soil: 2860-2470 cal BC (4050 ± 50 BP; Beta-223795), hazel charcoal 2830-2470 cal BC (4020 ± 40 BP; Beta-231837), hazel charcoal Two C14 dates on ?hearth below henge bank: 2840-2350 cal BC (4000 ± 50 BP; Beta-223792), hazel charcoal 2620-2350 cal BC (3980 ± 40 BP; Beta-231249), hazel charc…		Caseldine and Griffiths 2007, 2010	Caseldine, A.E. & Griffiths, C.J. 2010. Charred plant remains and charcoal, pp. 241–2 in A. Gibson, Excavation and Survey at Dyffryn Lane Henge Complex, Powys, and a Reconsideraton of the Dating of Henges. Proceedings of the Prehistoric Society 76, 213–48.	Caseldine, A.E. and Griffiths, C.J. 2007. The Charred Plant Remains from Dyffryn Lane. Unpublished Report. Report for Clwyd-Powys Archaeological Trust. University of Wales, Lampeter.
Fan	25	South-West	52.2078	-4.10195	Early Neolithic	Pottery; C14	2	Pit Group?	Pits	Yes	Yes	2011	2013	Charred plant remains (trace). Cereal grain (+) (?emmer wheat) Weed seeds and other (+) Hazel nutshell (+), in possible ENeo pit	Four C14 dates obtained on seperature features: 3950-3690 cal BC (4998 ± 35 BP; SUERC-44714), charcoal (indet ring). 3640-3370 cal BC (4702 ± 35 BP; SUERC-44712), indet charcoal. 3650-3510 cal BC (4779 ± 29 BP; SUERC-42557), hazel/alder charcoal. 3660-3520 cal BC (4816 ± 29 BP; SUERC-42560), indet roundwood charcoal. Cereal grain present in C14 dated context (SUERC-42560). Possibly two periods of…		Foster et al. 2012, 2013	Foster, A., Foster, L., Walker, A. & Carrott, J. 2013. Charred plant remains, pp. 94 in D. Schlee, The excavation of Fan round barrow, near Talsarn, Ceredigion, 2010–11. Archaeologia Cambrensis 162, 67–104.	Foster, A., Foster, L., Walker, A. and Carrott, J. 2012. Assessment of biological remains from an evaluation excavation undertaken at Fan Barrow, Talsarn, Ceredigion, Wales (site code: FBT10/11). Unpublished Report. Palaeoecology Research Services Report 2012/27.
Felin Fulbrook	26	South-West	52.2448	-3.94901	Late Neolithic-Early Bronze Age (Beaker period)	C14	3	Burnt Mound	Burnt Mound	Yes	Yes	1980	1987	No charred plant remains recovered.	One C14 date from burnt mound: 2570-2140 cal BC (3875 ± 70 BP; CAR-469), charcoal		Williams et al. 1987	Williams, G.H., Taylor, J.A., Hunt, C., Heyworth, A. & Benson, D.G. 1987. A burnt mound at Felin Fulbrook, Tregaron, Ceredigion. Bulletin of the Board of Celtic Studies 34, 228–43.
Four Crosses	27	Central	52.7617	-3.0822	Late Neolithic	Pottery	4	Pit	Pit	Yes	Yes	2004-2006	2017	No charred plant remains recovered.	One pit containing Grooved ware pottery.		Pearson 2007, 2017	Pearson, L. 2017. Plant macrofossil remains, pp.35–38 in T. Havard, T. Darvill & M. Alexander. A Bronze Age Round Barrow Cemetery, Pit Alignments, Iron Age Burials, Iron Age Copper Working, and Later Activity at Four Crosses, Llanysilio, Powys. Archaeological Journal 174, 1–67.	Pearson, L. 2007. Appendix 10: charred plant remains, pp. 53–61 in T. Havard & A. Hancocks. Land at Dogmay Lane, Four Crosses, Powys. Post-Excavation Assessment and Updated Project Design. Unpublished Report. Cotswold Archaeology Report 06046.
Four Crosses Site 2	28	Central Wales	52.762	-3.08191	Late Neolithic-Early Bronze Age (Beaker period)	C14	3	Pit	Pit	Yes	Yes	1980s	1986	Charred plant remains (rare). Cereal grains (+) (barley, indet cereal) Weed seeds and other (+)	Three C14 dates obtained from mixed charcoal from a pit containing Beaker pottery: 2910-2570 cal BC (4910 ± 70 BP; CAR-767), wood charcoal 2290-1890 cal BC (3690 ± 70 BP; CAR-810), wood charcoal 2570-2140 cal BC (3890 ± 70 BP; CAR-811), wood charcoal		Milles 1986	Milles, A. 1986. Charred plant remains from a beaker pit at site 2, Four Crosses, MF10 in M. Warrilow, G. Owen & W. Britnell, Eight Ring-ditches at Four Crosses, Llandysilio, Powys, 1981–1985. Proceedings of the Prehistoric Society 52, 53–87.
Gelli-Wern Isaf	29	South-West	51.699	-3.99782	Early Neolithic	C14	1	Pit	Pit	No	No	2006	n/a	Charred plant remains (abundant). Hazel nutshell ++++	Excavated as part of South Wales high pressure gas pipeline scheme. One C14 date from a pit: 3640-3370 cal BC (SUERC-57303; 4734 ± 30 BP), hazel nutshells		Rackham 2013	Rackham, J. 2013. The palaeoenvironmental evidence, pp. 9–10 in D. Sausins. South Wales Gas Pipeline Project. Site 238. Land South-West of Gelli-Wern-Isaf, Mawr, Swansea. Archaeological Watching Brief. Unpublished Report. Cotswold Archaeology Report 13218.
Glan-rhŷd Bridge (1)	30	South-West	51.7772	-4.66886	Late Neolithic	C14	2	Burnt Mound	Burnt Mounds	No	No	2007, 2014-2015	n/a	Charred plant remains (occasional). Hazel nutshell ++	Excavated as part of South Wales high pressure gas pipeline scheme. Site forms part of dense concentration of burnt mounds ranging in date from the Late Neolithic to Middle Bronze Age. Two C14 dates from burnt mound 506007: 2900-2670 cal BC (4195 ± 29 BP; SUERC-52549), hazel charcoal 2860-2500 cal BC (4103 ± 29 BP; SUERC-52550), oak charcoal Two C14 dates on trough associated with burnt mound: 27…		Rackham 2014	Rackham, J. 2014. The palaeoenvironmental evidence, pp. 25–36 in A. Barber & J. Hart. South Wales Gas Pipeline Project. Site 506. Land East of Glan-rhŷd Bridge, Lampeter Velfrey, Pembrokeshire. Unpublished Report. Cotswold Archaeology Report 13249.
Glan-rhŷd Bridge (2)	31	Central	51.7772	-4.66886	Late Neolithic-Early Bronze Age (Beaker period)	C14	2	Burnt Mound	Burnt Mounds	No	No	2007, 2014-2015	n/a	Excavated as part of South Wales high pressure gas pipeline scheme. Charred plant remains (rare). Hazel nutshell +	Site forms part of dense concentration of burnt mounds ranging in date from the Late Neolithic to Middle Bronze Age. Two C14 dates on burnt mound 506034: 2470-2210 cal BC (3881 ± 29 BP; SUERC-52544), oak sapwood charcoal 2470-2280 cal BC (3891 ± 29 BP; SUERC-52548), hazel charcoal Two C14 dates on burnt mound 506082: 2460-2200 cal BC (3858 ± 29 BP; SUERC-52562), ivy charcoal 2470-2210 cal BC (387…		Rackham 2014	Rackham, J. 2014. The palaeoenvironmental evidence, pp. 25–36 in A. Barber & J. Hart. South Wales Gas Pipeline Project. Site 506. Land East of Glan-rhŷd Bridge, Lampeter Velfrey, Pembrokeshire. Unpublished Report. Cotswold Archaeology Report 13249.
Gurrey Cottage	32	South-West	51.8961	-3.9974	Early Neolithic	Pottery; C14	1	Pit	Pit	No	No	2007	n/a	Charred plant remains (abundant). Hazel nutshell ++++ Crab apple seeds + Cereal grains (+) (emmer wheat, emmer/spelt wheat, indet cereal) Cereal chaff (+) (emmer wheat, emmer/spelt wheat)	Excavated as part of South Wales high pressure gas pipeline scheme. Direct C14 date on emmer wheat grains. Two C14 dates from same context (contains cereal assemblage): 3770-3640 cal BC (SUERC-57299; 4913 ± 30 BP), hazel nutshell (x3 fragments) 3770-3640 cal BC (SUERC-57299; 4939 ± 30 BP), emmer wheat grains (x3 grains)		Rackham 2013	Rackham, J. 2013. The palaeoenvironmental evidence, pp. 16-25 in J. Hart South Wales Gas Pipeline Project Sites 24.06 and 24.07. Land North-East of Gurrey Cottage, Llandeilo, Carmarthenshire. Archaeological Excavation. Unpublished Report. Cotswold Archaeology Report 13274
Gwernvale	33	Central	51.8659	-3.14712	Early Neolithic	Pottery; C14	3	ENeo Midden/Structure	See comments	Yes	No	1977-1978	n/a	Charred plant remains. hazel nutshell dominant. Cereal grains (indet cereal, emmer wheat, barley). Rubus sp stones present. Weed seeds present.	Archaeobotanical report for site not published. Only a summary available (Caseldine pers comm). Early Neolithic pottery present. One C14 date obtained from feature associated with ENeo structure: 3980-3670 cal BC (5050 ± 80 BP; CAR-113), charcoal Four Early Neolithic radiocarbon dates also obtained on cereal grains (Caseldine pers comm.)		Britnell 1984; Caseldine pers comm	Britnell, W.J. 1984. The Gwernvale Long Cairn, Crickhowell, Brecknock. In W.J. Britnell & H.N. Savory (eds), Gwernvale and Penywyrlod: Two Neolithic Long Cairns in the Black Mountains of Brecknock, 43–154. Cardiff: Cambrian Archaeological Monograph 2.
Hendre	34	North-East	53.2065	-3.20822	Late Neolithic-Early Bronze Age (Beaker period)	Pottery; C14	3	Pit Group	Pits	Yes	Yes	1989	1999	Charred plant remains (abundant). Hazel nutshell ++++ Cereal grains (+) (indet cereal) Weed seeds and other (+)	One C14 date on a pit: 2570-2140 cal BC (3870 ± 70 BP; CAR-1279), alder charcoal Grooved ware pottery present. Context containg cereal grain was not C14 dated. One Late Neolithic C14 date was obtained on charcoal the fill of a ?ditch. This may relate to sample <6> which contained hazlenut shell ++++. However, the exact location of this sample is unclear.		Caseldine 1999	Caseldine, A.E. 1999. The charred plant remains, pp. 95–6 in K. Brassil & A. Gibson, A Grooved Ware Pit Group and Bronze Age Multiple Inhumation at Hendre, Rhydymwyn, Flintshire. In R. Cleal and MacSween (eds), Grooved Ware in Britain and Ireland, 89–97. Oxford: Oxbow Books.
Hindwell Cursus	35	Central	52.2375	-3.10909	Early Neolithic	C14	4	Cursus Monument	Ditch fill(s)	No	No	2008-2011	n/a	Charred plant remains (abundant). Hazel nutshell (+) Acorn nutshell (+) Crab apple (+) Weed seeds and other ++++	Two C14 dates from northern ditch (middle ditch-fill): 3940-3660 cal BC (4995 ± 40 BP; SUERC-34209), unidentified charcoal 5300-5060 cal BC (6225 ± 35 BP; SUERC-34213), alder charcoal Three C14 dates from southern ditch: 3950-3710 cal BC (5030 ± 35 BP; SUERC-24618), hazel charcoal (upper ditch-fill) 3780-3640 cal BC (4900 ± 45 BP; SUERC-24834), hazel charcoal (upper ditch-fill) 3660-3520 cal BC (…		Caseldine and Griffiths 2012	Caseldine, A.E. and Griffiths, C.J. 2012. Charred plant remains, in N.W. Jones, The Hindwell Cursus Radnorshire. Excavation and Geophysical Survey 2011. Unpublished report. Clwyd Powys Archaeological Trust Report 1114.
Hindwell Double Palisaded Enclosure	36	Central	52.2394	-3.09347	Late Neolithic-Early Bronze Age (Beaker period)	Pottery; C14	2	Palisaded Enclosure	Post Holes/Post-Pipes (monument); Palisade Trench	Yes	Yes	2010-2013	2017	Charred plant remains (trace). Hazel nutshell (+) Weed seeds and other (+)	One C14 date on charred post in outer circuit: 2870-2570 cal BC (4110 ± 30 BP; SUERC-35386), oak charcoal (charred post) Two C14 dates on ?weathering cone in inner circuit: 2630-2470 cal BC (4035 ± 28 BP; SUERC-43284), cremated sheep/goat bone 2470-2290 cal BC (3895 ± 28 BP; SUERC-43282), hazel nutshell Two C14 dates on charred post(s) in inner circuit: 2580-2460 cal BC (3983 ± 29 BP; SUERC-43280…		Caseldine et al. 2017	Caseldine, A.E., Griffiths, C.J. & Bale, R.J. 2017. Charred plant remains and charcoal, pp. 59–63 in N.W. Jones & A. Gibson, Neolithic palisaded enclosures of Radnoshire's Walton Basin. Archaeologia Cambrensis 166, 33–88.
Hindwell Palisaded Enclosure	37	Central	52.2398	-3.09138	Late Neolithic-Early Bronze Age (Beaker period)	C14	2	Palisaded Enclosure	Post Holes/Post-Pipes (monument); Palisade Trench	Yes	Yes	1995-1996	1999	Charred plant remains (abundant). Acorn (+) Sloe (+) Elder (+) Bramble (+) Weed Seeds and Other ++++ Assemblage dominated by grass rhizome/stem fragments	Four C14 dates on charred oak posts: 2840-2200 cal BC (3960 ± 70 BP; Swan-116), oak charcoal (outer-rings) 2880-2490 cal BC (4070 ± 70 BP' Swan-117), oak charcoal (outer-rings) 2880-2340 cal BC (4040 ± 80 BP; Swan-230), oak charcoal (outer-rings) 2900-2490 cal BC (4085 ± 80 BP; Swan-231), oak charcoal (outer-rings)		Caseldine and Barrow 1999	Caseldine, A.E. and Barrow, C. J. 1999. The charred plant remains from Walton, pp.141-150 in A. Gibson (ed.) The Walton Basin Project: Excavation and Survey in a Prehistoric Landscape 1993-7 (Current British Archaeology Research Report 118). York: Council for British Archaeology.
Hirdre-Faig	38	North-West	53.2488	-4.27901	Late Neolithic-Early Bronze Age (Beaker period)	Pottery; C14	2	Pit	Pit	No	No	2008-2009	n/a	Charred plant remains (abundant). Hazel nutshell ++++ Cereal grains + (barley, indet cereal)	One C14 date on pit (contains cereal assemblage): 2460-2050 cal BC (3800 ± 40 BP; Beta-280899), hazel charcoal Early Beaker pottery present.		McKenna 2010; Davidson et al. 2010	McKenna, R. 2010. Plant Macrofossil Assessment of Samples from Gwalchmai Booster to Bodffordd Link water main to Penymynydd replacement. Unpublished Report. Report for Gwynedd Archaeological Trust (GAT-2063-2010).	Davidson, A., Jones, M., Kenney, J., Rees, C. & Roberts, J. 2010. Gwalchmai Booster to Boffordd Link Water Main and Llangefni to Penymnydd Archaeological Mitigation Report. Unpublished Report. Gwynedd Archaeological Trust Report 885.
Llandefaeolog	39	Central	51.9723	-3.41086	Early Neolithic	C14	1	Pit	Pit	No	No	2007	n/a	Charred plant remains (abundant). Hazel nutshell ++++ Cereal grains ++ (barley, wheat, emmer wheat, indet cereal) Cereal chaff (+) (emmer/einkorn wheat)	Excavated as part of South Wales high pressure gas pipeline scheme. One C14 date from pit (contains cereal assemblage): 3650-3540 cal BC (Beta-435176; 4840 ± 30 BP), hazel nutshell		Rackham 2014	Rackham J. 2014. The palaeoenvironmental evidence, pp. 25–38 in L. Brannlund. South Wales Gas Pipeline Project. Sites 52.01-52.05. Archaeological Recording. Unpublished Report. Costwold Archaeology Report 13333.
Llandevenny	40	South-East	51.5756	-2.84917	Early Neolithic	C14	2	Occupation Layer?	Occupation Layer?	Yes	Yes	2002-2003	2007	Charred plant remains (abundant). Raspberry/blackberry ++++ Common nettle ++++ Elder + Sedge ++ Dock (+) Marsh Woundwort ++++ Waterlogged plant remains (abundant). Raspberry/blackberry +++ Common nettle (+) Elder (+) Ribwort plantain + Marsh woundwort	Mesolithic' layer stratified below layer dated to Early Neolithic. Plant remains may derive from burning of landscape. One C14 date on layer: 3770-3640 cal BC (4912 ± 31 BP; OxA-13537), raspberry/blackberry seeds		Brown 2005, Brown 2007	Brown, A.D. 2005. Wetlands and Drylands in Prehistory: Mesolithic to Bronze Age Human Activity and Impact in the Severn Estuary, Southwest Britain. Unpublished PhD Dissertation, University of Reading, Department of Archaeology.	Brown, A.D. 2007. Mesolithic to Neolithic human activity and impact at the Severn Estuary wetland edge: studies at Llandevenny, Oldbury Flats, Hills Flats, and Woolaston. In M. Bell (ed.), Prehistoric Coastal Communities: The Mesolithic in western Britain, 249–62. York: Council for British Archaeology Research Report 149.
Llanilar (1)	41	South-West	52.3567	-4.02045	Middle Neolithic	Pottery	4	Pit Group	Pits	Yes	Yes	1980-81; 1983; 1994	1997	Charred plant remains (abundant). Hazel nutshell ++++ Cereal grain (+) (barley)	Difficult to precisely phase features, the fills of some pits appear to be mixed and contain both Middle Neolithic pottery (Peterborough Ware) and Late Neolithic pottery (Grooved Ware). Difficult to resolve without C14 dating the date of some pits. 3/5 pits sampled contained Peterborough Ware only, these are tentatively dated to the Middle Neolithic.		Caseldine 1997	Caseldine, A.E. 1997. The Neolithic environment, pp. 24–25 in C.S. Briggs, A Neolithic and Early Bronze Age Settlement and Burial Complex at Llanilar, Ceredigion. Archaeologia Cambrensis 146, 13–59.
Llanilar (2)	42	South-West	52.3567	-4.02045	Late Neolithic	Pottery	4	Pit Group	Pits	Yes	Yes	1980-81; 1983; 1994	1997	Charred plant remains (abundant). Hazel nutshell ++++ Cereal grains (+) (wheat/barley, indet cereal)	Difficult to precisely phase features, the fills of some pits appear to be mixed and contain both Middle Neolithic pottery (Peterborough Ware) and Late Neolithic pottery (Grooved Ware). Difficult to resolve without C14 dating the date of some pits. 2/5 pits sampled contained Grooved Ware and Peterborough Ware. These are tentatively dated to the Late Neolithic on the basis of the latest pottery pr…		Caseldine 1997	Caseldine, A.E. 1997. The Neolithic environment, pp. 24–25 in C.S. Briggs, A Neolithic and Early Bronze Age Settlement and Burial Complex at Llanilar, Ceredigion. Archaeologia Cambrensis 146, 13–59.
Lower Scoveston (1)	43	South-West	51.7202	-4.99652	Early Neolithic	Pottery	4	Pit Group	Pits	No	No	2006	n/a	Charred plant remains (rare). Hazel nutshell +	Excavated as part of South Wales high pressure gas pipeline scheme. Probable Early Neolithic pottery present (c.3800-3400 cal BC).		Rackham 2013	Rackham, J. 2013. The palaeoenvironmental evidence, pp. 16–17 in L. Brunnland. South Wales Gas Pipeline Project. Site 286. Archaeological Watching Brief. Unpublished Report. Cotswold Archaeology Report 13216.
Lower Scoveston (1)	43	South-West	51.7202	-4.99652	Early Neolithic	Pottery	4	Pit Group	Pits	No	No	2006	n/a	Charred plant remains (rare). Hazel nutshell +	Excavated as part of South Wales high pressure gas pipeline scheme. Probable Early Neolithic pottery present (c.3800-3400 cal BC).		Rackham 2013	Rackham, J. 2013. The palaeoenvironmental evidence, pp. 16–17 in L. Brunnland. South Wales Gas Pipeline Project. Site 286. Archaeological Watching Brief. Unpublished Report. Cotswold Archaeology Report 13216.
Maescar	45	Central	51.9404	-3.54341	Late Neolithic	Pottery; C14	2	Pit Group	Pits	No	No	2007	n/a	Charred plant remains (abundant). Hazel nutshell ++++ Weed seeds and other (+)	Excavated as part of South Wales high pressure gas pipeline scheme. One C14 date on pit: 2580-2460 cal BC (3979 ± 30 BP; SUERC-57283), hazel nutshell (x3)		Rackham 2013	Rackham, J. 2013. The palaeenvironmental evidence, 11-13 in P. Busby. South Wales Gas Pipeline Project. Site 45.16. Land West of Maescar, Maescar, Powys. Archaeological Watching Brief. Unpublished Report. Cotswold Archaeology Report 13321.
Meusydd (1)	46	Central	52.8174	-3.28598	Middle-Late Neolithic	C14	2	Timber Circle	Post Holes (monument)	Yes	Yes	2007	2009	Charred plant remains (rare). Elder (+) Parenchymatous material (+) Weed seeds and other +	One C14 date on charcoal forming post of timber circle: 3330-2910 cal BC (4410 ± 40 BP; Beta-249071), oak charcoal One C14 date on a cremation associated with the timber circle: 3020-2760 cal BC (4280 ± 40 BP; Beta-249072), cremated human bone A second timber circle was also excavated, however, this was not C14 dated.		Caseldine and Griffiths 2009	Caseldine, A.E. & Griffiths, C.J. 2009. Charred plant remains, charcoal, and pollen analysis, pp. 59–63 in N.W. Jones Meusydd timber circles and ring-ditch, Llanrhaeadr-ym-Mochnant, Powys: excavation and survey, 2007. Archaeologia Cambrensis 158, 43–68.
Meusydd (2)	47	Central	52.8174	-3.28598	Late Neolithic-Early Bronze Age (Beaker period)	Pottery; C14	2	Ring Ditch	Ditch Fills; ?Grave	Yes	Yes	2007	2009	Charred plant remains (abundant). Parenchymatous material (+) Weed seeds and other ++++	One C14 date on ditch fill: 2460-2050 cal BC (3800 ± 40 BP; Beta-249074), oak charcoal One C14 date on palisade slot: 2460-2050 cal BC (3800 ± 40 BP; Beta-249074), oak charcoal Beaker pottery also present.		Caseldine and Griffiths 2009	Caseldine, A.E. & Griffiths, C.J. 2009. Charred plant remains, charcoal, and pollen analysis, pp. 59–63 in N.W. Jones Meusydd timber circles and ring-ditch, Llanrhaeadr-ym-Mochnant, Powys: excavation and survey, 2007. Archaeologia Cambrensis 158, 43–68.
Middle Bastleford	48	South-West	51.7482	-4.97693	Early Neolithic	Pottery; C14	2	Pit Group	Pits	No	No	2006	n/a	Charred plant remains abundant. Hazel nutshell ++++ Cereal grains + (indet cereal, wheat, emmer wheat) Crab apple/pear/Sorbus sp. (+) Vetch/tare/pea (+)	Excavated as part of South Wales high pressure gas pipeline scheme. Early Neolithic pottery present. Two C14 dates from one pit (contains cereal assemblage): 3900-3660 cal BC (SUERC-54570; 4968 ± 30 BP), hazel nutshell 3780-3640 cal BC (SUERC-54571; 4931 ± 30 BP), hazel charcoal One C14 date from one pit: 3710-3630 cal BC (SUERC-54572; 4863 ± 30 BP), hazel charcoal		Rackham 2014	Rackham, J. 2014. The palaeoenvironmental evidence, pp .26–29 in A. Barber and K.E. Walker. South Wales Gas Pipeline Project. Site 509. Land West of Middle Bastleford, Rosemarket, Pembrokeshire. Archaeological Excavation. Unpublished Report. Cotswold Archaeology Report 13252.
Moel y Gerddi (1)	49	North-West	52.8649	-4.05648	Middle Neolithic	C14	3	Pit	Pit	Yes	Yes	1980-1981	1988	Charred plant remains (rare). Hazel nutshell (+) Raspberry/blackberry (+) Weed seeds and other +	Two C14 dates from pit: 3630-3030 cal BC (4590 ± 80 BP; CAR-397), charcoal 3510-3010 cal BC (4540 ± 70 BP; CAR-527), charcoal Samples were either 50 litres or the maximum available.		Kelly 1988	Kelly, R.S. 1988. Two Late Prehistoric Circular Enclosures near Harlech, Gwynedd. Proceedings of the Prehistoric Society 54, 101–51.
Moel y Gerddi (2)	50	North-West	52.8649	-4.05648	Late Neolithic	C14	3	Pit	Pit	No	Yes	1980-1981	1988	Charred plant remains (trace). Weed seeds and other (+)	Possibly associated with Middle Neolithic activity (see Moel y Gerddi (2)), due to old-wood effect. One date obtained on pit: 2880-2340 cal BC (4030 ± 80 BP; CAR-528), charcoal		Kelly 1988	Kelly, R.S. 1988. Two Late Prehistoric Circular Enclosures near Harlech, Gwynedd. Proceedings of the Prehistoric Society 54, 101-151.
Mynydd Mwyn Farm	51	North-West Wales	53.2447	-4.24012	Middle-Late Neolithic	C14	2	Pit Group	Pits	No	No	2008-2009	n/a	Charred plant remains (abundant). Hazel nutshell ++++ Cereal grains + (indet cereal, barley, wheat) Weed seeds and other +++	Two C14 dates from on two pits: 3260-2900 cal BC (4380 ± 40 BP; Beta-280900), hazel charcoal 3310-2900 cal BC (4390 ± 40 BP; Beta-280901), hazel charcoal One of the C14 dated pits contained cereal grains.		McKenna 2010, Davidson et al. 2010	McKenna, R. 2010. Plant Macrofossil Assessment of Samples from Gwalchmai Booster to Bodffordd Link water main to Penymynydd replacement. Unpublished Report. Report for Gwynedd Archaeological Trust (GAT-2063-2010).	Davidson, A., Jones, M., Kenney, J., Rees, C. & Roberts, J. 2010. Gwalchmai Booster to Boffordd Link Water Main and Llangefni to Penymnydd Archaeological Mitigation Report. Unpublished Report. Gwynedd Archaeological Trust Report 885.
Nant Hall Road (1)	52	North-East	53.3371	-3.39874	Late Mesolithic-Early Neolithic	C14	3	Shell Midden	Shell Midden Layers	Yes	Yes	1992	2007	Charred plant remains. Cereal grains (+) (wheat, indet cereal) Blackberry seeds	Mollusc samples scanned for charred plant remains. One C14 date on shell midden (site C): 3940-3390 cal BC (4890 ± 80 BP; CAR-1355), charcoal. One C14 date on shell midden (site D): 3980-3530 cal BC (4910 ± 70 BP; CAR-1421), charcoal. One C14 date on upper shell midden layer (Site E): 4220-3700 cal BC (5110 ± 80 BP; CAR-1422), charcoal. Possible Early Neolithic context situated above Late Mesolit…		Caseldine 2007	Caseldine, A.E. 2007. Plant macrofossil analysis, pp. 295–6 in A. Armour-Chelu, M. Bell, B. Brayshay, W.J. Britnell, N. Cameron, A.E. Caseldine, P.Q. Dresser, E. Francourt, S. Gonzalez, E. Healy, S. Johnson, J. Norris-Hill, R. Schulting and D. Thomas, Shell middens and their environment at Prestatyn, north Wales. In M. Bell (ed.), Prehistoric Coastal Communities: The Mesolithic in western Britain…
Nant Hall Road (2)	53	North-West	53.3361	-3.83261	Late Neolithic	C14	3	Shell Midden/Tree-throw hole	Tree throw hole	Yes	Yes	1992	2007	No charred plant remains recovered.	Mollusc samples scanned for charred plant remains. One C14 date on three throw-hole: 3000-2580 cal BC (4210 ± 70 BP), charcoal		Caseldine 2007	Caseldine, A.E. 2007. Plant macrofossil analysis, pp. 295–6 in A. Armour-Chelu, M. Bell, B. Brayshay, W.J. Britnell, N. Cameron, A.E. Caseldine, P.Q. Dresser, E. Francourt, S. Gonzalez, E. Healy, S. Johnson, J. Norris-Hill, R. Schulting and D. Thomas, Shell middens and their environment at Prestatyn, north Wales. In M. Bell (ed.), Prehistoric Coastal Communities: The Mesolithic in western Britain…
Ogmore-by-Sea	54	South-East	51.4679	-3.64115	Middle Neolithic	Pottery; C14	2	Occupation Layer?	Occupation Layer? Pit?	No	No	1968, 1978	n/a	Charred plant remains. Hazel nutshell Pottery impressions of plant remains on Peterborough Ware: Celtic bean, ?crab apple, ?emmer wheat, ?hazelnut.	Two C14 dates associated with site: 3640-3340 cal BC (4659 ± 52; BM-1112), charcoal 3340-2670 cal BC (4320 ± 80; HAR-1140), hazel nutshell Unclear if sampling for plant remains was undertaken or whether the hazel nutshells are hand-retrieved.		Gibson 1998; Burrow 2003	Gibson, A.M. 1998. Neolithic pottery from Ogmore, Glamorgan. Archaeologia Cambrensis 147, 56–67.	Burrow, S. 2003. Catalogue of the Mesolithic and Neolithic Collections in the National Museums and Galleries of Wales. Cardiff: National Museums and Galleries of Wales.
Pant-y-Butler	55	South-West	52.0889	-4.61085	Middle Neolithic	C14	2	Pit (Pit Group?)	Pits	Yes	Yes	2009-2010	2013	Charred plant remains (abundant). Hazel nutshell ++++ Weed seeds and other + Hazelnut kernel fragments present	One C14 date obtained: 3500-3100 cal BC (4570 ± 35 BP; SUERC-37910), charred hazel nutshell		Caseldine and Griffiths 2013	Caseldine, A.E. & Griffiths, C.J. 2013. Charred plant remains and charcoal, pp. 53–9 in K. Murphy and F. Murphy (eds.), The excavation of two Bronze Age round barrows at Pant y Butler, Llangoedmor, Ceredigion, 2009–2010. Archaeologia Cambrensis 162, 33–66.
Pant-y-Ffin	56	South-West	51.7079	-3.9989	Middle Neolithic	Flint; C14	2	Pit Group?	Pits	No	No	2007	n/a	Charred plant remains (trace). Hazel nutshell (+)	Excavated as part of South Wales high pressure gas pipeline scheme. One C14 date obtained on a pit: 3490-3120 cal BC (4580 ± 40 BP; Beta-257712), unknown material		Rackham 2013	Rackham, J. 2013. The palaeoenvironmental evidence, pp. 14–17 in C. Leonard. South Wales Gas Pipeline Project Sites 01.24-01.26. Archaeological Watching Brief. Unpublished Report. Cotswold Archaeology Report 9150.
Parc Bryn Cegin (1)	57	North-West	53.2133	-4.10641	Early Neolithic	Pottery; C14	2	ENeo Structure and Pits	ENeo structure (post-holes, layers); Pits	Yes	No	2005	n/a	Charred plant remains (abundant). Hazel nutshell ++++ Cereal grains +++ (indet cereal, barley, emmer wheat, naked wheat) Cereal chaff (+) (emmer wheat) Raspberry/blackberry (+) Weed seeds and other (+) Charred plant remains rare in other groups	Fourteen C14 dates obtained on features associated with ENeo structure (c.3800-3600 cal BC). Early Neolithic pottery also present. 3710-3650 cal BC (4912 ± 29 BP; KIA-31086), wheat grain 3720-3650 cal BC (4924 ± 30 BP; KIA-30434), emmer wheat grain 3710-3650 cal BC (4905 ± 34 BP; KIA-31087), cereal grain A further 8 C14 dates were obtained from ENeo pits (including one residual Mesolithic C14 dat…		Kenney and Davidson 2006; Kenney 2008; Schmidl et al. 2008	Kenney, J. 2008. Recent Excavations at Parc Bryn Cegin, Llandygai, near Bangor, North Wales. Archaeologia Cambrensis 157, 9–142.	Schmidl, A., Carrott, J. and Jaques, D. 2008. Appendix XIV: The Biological Remains. In J. Kenney, Recent Excavations at Llandygai, near Bangor, North Wales. Volume III: appendices, 122–82. Bangor: Gwynedd Archaeological Trust Report 764.	Kenney, J. & Davidson, A. 2006. Parc Bryn Cegin, Llandygai. Assessment of potential for analysis report. Unpublished Report. Gwynedd Archaeological Trust Report 640.
Parc Bryn Cegin (2)	58	North-West	53.2124	-4.10414	Middle Neolithic	Pottery; C14	3	Pit Groups	Pits	Yes	No	2005	2008	Charred plant remains (abundant). Hazel nutshell ++++ Cereal grains (+) (indet cereal, barley)	Archaeobotanical evidence from 6 pit groups. Multiple C14 dates on features in pit groups obtained. Peterborough Ware pottery present. Pit Group V: 3340-3030 cal BC (4479 ± 30 BP; NZA-26679), residue on pottery sherd. Pit Group VI (two C14 dates from same context): 3340-3030 cal BC (4467 ± 30 BP; NZA-26687), hazel nutshell 3360-3100 cal BC (4517 ± 30 BP; NZA-26688), hazel nutshell Pit containing …		Kenney and Davidson 2006; Kenney 2008; Schmidl et al. 2008	Kenney, J. 2008. Recent Excavations at Parc Bryn Cegin, Llandygai, near Bangor, North Wales. Archaeologia Cambrensis 157, 9–142.	Schmidl, A., Carrott, J. and Jaques, D. 2008. Appendix XIV: The Biological Remains. In J. Kenney, Recent Excavations at Llandygai, near Bangor, North Wales. Volume III: appendices, 122–82. Bangor: Gwynedd Archaeological Trust Report 764.	Kenney, J. & Davidson, A. 2006. Parc Bryn Cegin, Llandygai. Assessment of potential for analysis report. Unpublished Report. Gwynedd Archaeological Trust Report 640.
Parc Bryn Cegin (3)	59	North-West	53.2144	-4.11323	Middle Neolithic	C14	3	Burnt Mound	Burnt Mound	Yes	No	2005	2008	Charred plant remains (trace). Hazel nutshell (+)	Two C14 dates obtained on burnt mound deposit: 3500-3100 cal BC (4572 ± 32 BP; KIA-30449), hazel nutshell 3340-3020 cal BC (4467 ± 29 BP; KIA-30550), hazel nutshell		Kenney and Davidson 2006; Kenney 2008; Schmidl et al. 2008	Kenney, J. 2008. Recent Excavations at Parc Bryn Cegin, Llandygai, near Bangor, North Wales. Archaeologia Cambrensis 157, 9–142.	Schmidl, A., Carrott, J. and Jaques, D. 2008. Appendix XIV: The Biological Remains. In J. Kenney, Recent Excavations at Llandygai, near Bangor, North Wales. Volume III: appendices, 122–82. Bangor: Gwynedd Archaeological Trust Report 764.	Kenney, J. & Davidson, A. 2006. Parc Bryn Cegin, Llandygai. Assessment of potential for analysis report. Unpublished Report. Gwynedd Archaeological Trust Report 640.
Parc Bryn Cegin (4)	60	North-West	53.2124	-4.10414	Late Neolithic	Pottery; C14	3	Pit Groups	Pits	Yes	No	2005	2008	Charred plant remians (abundant). Hazel nutshell ++++	Archaeobotanical evidence from two pit groups combined. Three pits C14 dated (two C14 dates for each pit). 2890-2640 cal BC (4178 ± 30 BP; NZA-26691), hazel nutshell (feature 1309) 2870-2620 cal BC (4139 ± 30 BP; NZA-26692), hazel nutshell (feature 1309)		Kenney and Davidson 2006; Kenney 2008; Schmidl et al. 2008	Kenney, J. 2008. Recent Excavations at Parc Bryn Cegin, Llandygai, near Bangor, North Wales. Volume 1: The Text. Gwynedd Archaeological Trust Report 764.	Schmidl, A., Carrott, J. and Jaques, D. 2008. Appendix XIV: The Biological Remains. In J. Kenney, Recent Excavations at Llandygai, near Bangor, North Wales. Volume III: appendices, 122–82. Bangor: Gwynedd Archaeological Trust Report 764.	Kenney, J. & Davidson, A. 2006. Parc Bryn Cegin, Llandygai. Assessment of potential for analysis report. Unpublished Report. Gwynedd Archaeological Trust Report 640.
Parc Bryn Cegin (5)	61	North-West	53.2124	-4.10414	Late Neolithic-Early Bronze Age (Beaker period)	C14	3	Burnt Mound	Burnt Mounds	Yes	No	2005	2008	Charred plant remains (rare) Hazel nutshell + Cereal grains (+) (indet cereal*) *Cereal grain intrusive (Early Bronze Age date returned)	Numerous burnt mounds excavated ranging in date from the Late Neolithic to Early Bronze Age. Extensive C14 dating undertaken which indicates that many burnt mounds contain material of different ages. Difficult to assign samples to phases.		Kenney and Davidson 2006; Kenney 2008; Schimdl et al. 2008	Kenney, J. 2008. Recent Excavations at Parc Bryn Cegin, Llandygai, near Bangor, North Wales. Volume 1: The Text. Bangor: Gwynedd Archaeological Trust Report 764.	Schmidl, A., Carrott, J. and Jaques, D. 2008. Appendix XIV: The Biological Remains. In J. Kenney, Recent Excavations at Llandygai, near Bangor, North Wales. Volume III: appendices, 122–82. Bangor: Gwynedd Archaeological Trust Report 764.	Kenney, J. & Davidson, A. 2006. Parc Bryn Cegin, Llandygai. Assessment of potential for analysis report. Unpublished Report. Gwynedd Archaeological Trust Report 640.
Parc Cybi (1)	62	North-West	53.293	-4.61599	Early Neolithic	Pottery; see comments	4	ENeo Structure and Pits	ENeo structure (post-holes, layers); Pits	No	No	2008-2009	n/a	Charred plant remains (unknown quantity). No cereal grain identified in assessment. Hazel nutshell ++++	Flots assessed only. Residues not assessed. Full analysis not undertaken. C14 dating not yet undertaken.		Kenney 2011; Grinter 2011	Kenney, J., McGuinness, N., Cooke, R., Rees, C. & Davidson, A. 2011. Parc Cybi, Holyhead: post excavation assessment of potential report. Volume 1. Unpublished Report. Gwynedd Archaeological Trust Report 954.	Grinter, P. 2011. Charred plant macrofossils, pp. 154–210 in J. Kenney, Parc Cybi, Holyhead: post excavation assessment of potential report volume II: specialist reports. Unpublished Report. Gwynedd Archaeological Trust Report 954.
Parc Cybi (2)	63	North-West	53.293	-4.61599	Middle Neolithic	Pottery; see comments	4	Pit Groups	Pits	No	No	2008-2009	n/a	Charred plant remains (unknown quantity). No cereal grain identified in assessment. Hazel nutshell ++++	Flots assessed only. Residues not assessed. Full analysis not undertaken. C14 dating not yet undertaken.		Kenney 2011; Grinter 2011	Kenney, J., McGuinness, N., Cooke, R., Rees, C. & Davidson, A. 2011. Parc Cybi, Holyhead: post excavation assessment of potential report. Volume 1. Unpublished Report. Gwynedd Archaeological Trust Report 954.	Grinter, P. 2011. Charred plant macrofossils, pp. 154–210 in J. Kenney, Parc Cybi, Holyhead: post excavation assessment of potential report volume II: specialist reports. Unpublished Report. Gwynedd Archaeological Trust Report 954.
Parc Cybi (3)	64	North-West	53.293	-4.61599	Late Neolithic	Pottery; see comments	4	Pit Groups	Pits	No	No	2008-2009	n/a	Charred plant remains (unknown quantity). No cereal grain identified in assessment. Hazel nutshell ++++	Flots assessed only. Residues not assessed. Full analysis not undertaken. C14 dating not yet undertaken.		Kenney 2011; Grinter 2011	Kenney, J., McGuinness, N., Cooke, R., Rees, C. & Davidson, A. 2011. Parc Cybi, Holyhead: post excavation assessment of potential report. Volume 1. Unpublished Report. Gwynedd Archaeological Trust Report 954.	Grinter, P. 2011. Charred plant macrofossils, pp. 154–210 in J. Kenney, Parc Cybi, Holyhead: post excavation assessment of potential report volume II: specialist reports. Unpublished Report. Gwynedd Archaeological Trust Report 954.
Parc y Wern	65	South-West	51.9017	-4.89277	Early Neolithic	C14	1	Pit	Pit	No	No	2012	n/a	Charred plant remains (trace). Hazel nutshell (+)	Very small soil sample (0.2 l). One C14 date from pit: 3640-3520 cal BC (4800 ± 30 BP; Beta-326247), hazel nutshell		Hall and Sambrook 2013	Hall, J. & Sambrook, P. 2013. Parc y Wern, Tufton, Pembrokeshire. Watching Brief. Unpublished Report. Trysor Report 2012/257.
Penrhos Road (1)	66	North-West	53.2058	-4.16519	Early Neolithic	C14	1	Pits	Pit	No	No	2012	n/a	No charred plant remains recovered.	One C14 date from pit: 3640-3380 cal BC (4740 ± 26 BP; SUERC-45100), Maloideae charcoal Pits possibly associated with Penrhos Road (3)		Bradley 2013	Bradley, J. 2013. Land off Penrhos Road, Bangor, Gwynedd. Archaeological Evaluation Report. Unpublished Report. Oxford Archaeology North Report 2013-14/1386.
Penrhos Road (2)	67	North-West	53.2058	-4.16519	Middle Neolithic	C14	1	Pit	Pit	No	No	2012	n/a	No charred plant remains recovered.	One C14 date on pit: 3500-3130 cal BC (4586 ± 23 BP; SUERC-44195), hazel charcoal charcoal Pit possibly associated with Penrhos Road (2)		Bradley 2013	Bradley, J. 2013. Land off Penrhos Road, Bangor, Gwynedd. Archaeological Evaluation Report. Unpublished Report. Oxford Archaeology North Report 2013-14/1386.
Pentrehobin	68	Central	53.1534	-3.12867	Late Neolithic-Early Bronze Age (Beaker period)	C14	4	Round Barrow/Ring-Ditch	Ditch fills; Pit/Grave?	Yes	Yes	2010	2012	Charred plant remains (occasional). Ditch-fill: Crab apple (+) Weed seeds and other ++ Pits: Weed seeds and other (+)	One C14 date on central pit/grave (oak coffin?): 2400-2140 cal BC (3810 ± 30 BP; SUERC-32382), oak charcoal (mature) No dating evidence for samples from ditch-fills.		Caseldine et al. 2012	Caseldine, A.E., Griffiths, C.J. & Bale, R.J. 2012. Charred plant remains and charcoal identifications from trial excavations on large ring-ditches, pp. 183–9 in W.J. Britnell and N.W. Jones, Large late Neolithic and early Bronze Age ring-ditches in Wales. Archaeologia Cambrensis 161, 165–98.
Pen-y-Banc	69	South-West	51.8951	-4.01333	Middle Neolithic	Pottery; C14	1	Pit Group?	Pit	No	No	2007	n/a	Charred plant remains (abundant). Hazel nutshell ++++	Excavated as part of South Wales high pressure gas pipeline scheme. Two C14 dates obtained on the same context in a pit: 3490-3120 cal BC (4580 ± 40 BP; Beta-257720), hazel nutshell 3360-3090 cal BC (4515 ± 29 BP; SUERC-547500), hazel nutshell Peterborough Ware pottery present.		Rackham 2013	Rackham, J. 2013. The palaeoenvironmental evidence, pp. 14–19 in J. Hart. South Wales Gas Pipeline Project. Site 23.07. Archaeological Watching Brief. Unpublished Report. Cotswold Archaeology Report 13268.
Pen-y-Crug	70	Central	51.9679	-3.41699	Early Neolithic	Pottery; C14	2	Pit Group	Pits	No	No	2007	n/a	Charred plant remains (abundant). Hazel nutshell ++++ Cereal grains ++++ (indet cereal, barley, naked barley, wheat, emmer wheat, emmer/einkorn wheat, naked wheat) Cereal chaff + (wheat, emmer wheat)	Excavated as part of South Wales high pressure gas pipeline scheme. One C14 date from one pit (contains cereal assemblage): 3710-3630 cal BC (SUERC-54692; 4866 ± 29 BP), hazel nutshell. Two C14 dates from one pit (contains cereal assemblage): 3670-3530		Rackham 2014	Rackham, J. 2014. The plaeoenvironmental evidence, pp. 29-62 in J. Hart & C. Leonard. South Wales Gas Pipeline Project. Site 51.07. Land North-West of Pen-y-Crug, Yscir, Powys. Archaeological Excavation. Unpublished Report. Cotswold Archaeology Report 13220.
Penymynydd (1)	71	North-West	53.277	-4.52199	Early Neolithic	C14	3	Pit	Pit	Yes	No	1999	n/a	No charred plant remains recovered.	Flots assessed only. Residues not assessed. Full analysis not undertaken. One C14 date obtained on pit: 3950-3630 cal BC (4950 ± 70 BP; Beta-152579), charcoal		Smith 1999; Kenney and Shalcross 2012	Smith, W. 1999. Charred plant remains, in Birmingham Archaeology Field Unit, A55 DBFO Archaeological Investigations. Assessments of Finds and Charred Plant Remains from Sites Excavated by the Gwynedd Archaeological Trust. Unpublished Report. Birmingham Archaeology Unit Report 578.01.	Kenney, J. and Shalcross, A. 2012. Penymynydd, Caergeiliog: Neolithic and early Bronze Age activity and occupation. In R. Cuttler, A. Davidson & G. Hughes (eds), A Corridor Through Time: The Archaeology of the A55 Anglesey Road Scheme, 96–103. Oxford: Oxbow Books.
Penymynydd (2)	72	North-West	53.277	-4.52199	Middle Neolithic	Pottery; C14	3	Pit Group	Pits	Yes	No	1999	n/a	Charred plant remains. Hazel nutshell (not quantified)	Flots assessed only. Residues not assessed. Full analysis not undertaken. Peterborough pottery present. One C14 date obtained on pit: 3350-2920 cal BC (4460 ± 50 BP; Beta-156487), charcoal.		Smith 1999; Kenney and Shalcross 2012	Smith, W. 1999. Charred plant remains, in Birmingham Archaeology Field Unit, A55 DBFO Archaeological Investigations. Assessments of Finds and Charred Plant Remains from Sites Excavated by the Gwynedd Archaeological Trust. Unpublished Report. Birmingham Archaeology Unit Report 578.01.	Kenney, J. and Shalcross, A. 2012. Penymynydd, Caergeiliog: Neolithic and early Bronze Age activity and occupation. In R. Cuttler, A. Davidson & G. Hughes (eds), A Corridor Through Time: The Archaeology of the A55 Anglesey Road Scheme, 96–103. Oxford: Oxbow Books.
Plas Gogerddan	73	South-West	52.4323	-4.02185	Early Neolithic	C14	2	Pit	Pit	Yes	Yes	1986	1992	Charred plant remains (abundant). Hazel nutshell ++++ Cereal grains ++++ (indet cereal, barley, wheat, emmer wheat, emmer/spelt wheat) Cereal chaff ++++ (indet cereal, wheat, emmer wheat) Crab apple ++++ Weed seeds and other (+)	1mm sieve used for flotation. Residue not analysed. Weed seeds and hazel nutshell could be under-represented. One C14 date obtained on pit (contains cereal assemblage): 3640-3360 cal BC (4700 ± 70 BP; CAR-994), mixed wood charcoal		Caseldine 1992	Caseldine, A.E. 1992. The Neolithic carbonized plant remains from pit 206, pp. 24–6 in K. Murphy, Plas Gogerddan, Dyfed: A Multi-Period Burial and Ritual Site. Archaeological Journal 149, 1–38.
Pwllheli to Blaenau Ffestiniog Pipeline Plot 6/21	74	North-West	52.935	-4.20762	Late Neolithic-Early Bronze Age (Beaker period)	C14	3	Burnt Mound	Burnt Mound	No	No	2011	n/a	Charred plant remains (trace). Hazel nutshell (+)	Numerous burnt mounds investigated in pipeline project ranging in date from the Late Neolithic-Late Bronze Age, thuogh an Early Medieval burnt mound was also present. Many of the burnt mound deposits date between the Late Neolithic-Early Bronze Age (Beaker period) (c.2500-2200 cal BC). Two C14 dates on burnt mound pit/trough: 2890-2640 cal BC (4183 ± 29 BP; SUERC-46839), hazel charcoal 2580-2460 …		Challinor et al. 2014; Kenney 2014	Challinor, D., Giorgi, J. & Rackham, J. 2014. Analaysis of charcoal and charred plant remains, pp. 42–79, in R. Bale, M.R. Bates, K. Cootes, J.A. Giorgi, J. Goodwin, F. Grant, D. Hamilton, D. Jenkins, R.I. Macphail, J.I. McKinley, N. Nayling, J. Rackham, G. Smith and T. Young, Gas Pipeline Replacement: Pwllheli to Blaenau Ffestiniog. Report on archaeological mitigation Volume II: specialist repor…	Kenney, J. 2014. Gas Pipeline Replacement: Pwllheli to Blaenau Ffestiniog. Report on archaeological mitigation. Volume 1. Unpublished Report. Gwynedd Archaeological Trust Report 1136.
Pwllheli to Blaenau Ffestiniog Pipeline Plot 6/29.4	75	North-West	52.9332	-4.19967	Late Neolithic	C14	3	Burnt Mound	Burnt Mounds	No	No	2011	n/a	No charred plant remains recovered.	Numerous burnt mounds investigated in pipeline project ranging in date from the Late Neolithic-Late Bronze Age, thuogh an Early Medieval burnt mound was also present. Many of the burnt mound deposits date between the Late Neolithic-Early Bronze Age (Beaker period) (c.2500-2200 cal BC). Difficult to phase some samples. C14 dates on burnt mound pit/trough: 2480-2300 cal BC (3920 ± 24 BP; SUERC-4682…		Challinor et al. 2014; Kenney 2012	Challinor, D., Giorgi, J. and Rackham, J. 2014. Analaysis of charcoal and charred plant remains, pp. 42–79, in R. Bale, M.R. Bates, K. Cootes, J.A. Giorgi, J. Goodwin, F. Grant, D. Hamilton, D. Jenkins, R.I. Macphail, J.I. McKinley, N. Nayling, J. Rackham, G. Smith and T. Young, Gas Pipeline Replacement: Pwllheli to Blaenau Ffestiniog. Report on archaeological mitigation Volume II: specialist rep…	Kenney, J. 2014. Gas Pipeline Replacement: Pwllheli to Blaenau Ffestiniog. Report on archaeological mitigation. Volume 1. Unpublished Report. Gwynedd Archaeological Trust Report 1136.
Pwllheli to Blaenau Ffestiniog Pipeline Plot 6/33 (1)	76	North-West	52.9382	-4.19497	Late Neolithic-Early Bronze Age (Beaker period)	C14	3	Burnt Mound	Burnt Mounds	No	No	2011	n/a	Charred plant remains (trace). Hazel nutshell (+) Raspberry/blackberry (+)	Numerous burnt mounds investigated dating from the Late Neolithic to Early Bronze Age. Extensive C14 dating undertaken which indicates that many burnt mounds contain material of different ages. Difficult to assign samples to phases.		Challinor et al. 2014; Kenney 2014	Challinor, D., Giorgi, J. and Rackham, J. 2014. Analaysis of charcoal and charred plant remains, pp. 42–79, in R. Bale, M.R. Bates, K. Cootes, J.A. Giorgi, J. Goodwin, F. Grant, D. Hamilton, D. Jenkins, R.I. Macphail, J.I. McKinley, N. Nayling, J. Rackham, G. Smith and T. Young, Gas Pipeline Replacement: Pwllheli to Blaenau Ffestiniog. Report on archaeological mitigation Volume II: specialist rep…	Kenney, J. 2014. Gas Pipeline Replacement: Pwllheli to Blaenau Ffestiniog. Report on archaeological mitigation. Volume 1. Unpublished Report. Gwynedd Archaeological Trust Report 1136.
Pwllheli to Blaenau Ffestiniog Pipeline Plot 6/33(2)	77	North-West	52.9382	-4.19497	Late Neolithic-Early Bronze Age (Beaker period)	C14	3	Burnt Mound	Burnt Mound	Yes	No	2011	n/a	No charred plant remains recovered.	Numerous burnt mounds investigated in pipeline project ranging in date from the Late Neolithic-Late Bronze Age, thuogh an Early Medieval burnt mound was also present. Many of the burnt mound deposits date between the Late Neolithic-Early Bronze Age (Beaker period) (c.2500-2200 cal BC). Two C14 dates on pit (probably associated with burnt mound): 2480-2290 cal BC (3901 ± 29 BP; SUERC-46827), ash c…		Challinor et al. 2014; Kenney 2014	Challinor, D., Giorgi, J. and Rackham, J. 2014. Analaysis of charcoal and charred plant remains, pp.42-79, in R. Bale, M.R. Bates, K. Cootes, J.A. Giorgi, J. Goodwin, F. Grant, D. Hamilton, D. Jenkins, R.I. Macphail, J.I. McKinley, N. Nayling, J. Rackham, G. Smith and T. Young, Gas Pipeline Replacement: Pwllheli to Blaenau Ffestiniog. Report on archaeological mitigation Volume II: specialist repo…	Kenney, J. 2014. Gas Pipeline Replacement: Pwllheli to Blaenau Ffestiniog. Report on archaeological mitigation. Volume 1. Unpublished Report. Gwynedd Archaeological Trust Report 1136.
Pwllheli to Blaenau Ffestiniog Pipeline Plot 6/6	78	North-West	52.9267	-4.22929	Late Neolithic-Early Bronze Age (Beaker period)	C14	3	Burnt Mound	Burnt Mounds	No	No	2011	n/a	Charred plant remains (trace). Hazel nutshell (+)	Numerous burnt mounds investigated in pipeline project ranging in date from the Late Neolithic-Late Bronze Age, thuogh an Early Medieval burnt mound was also present. Many of the burnt mound deposits date between the Late Neolithic-Early Bronze Age (Beaker period) (c.2500-2200 cal BC). Two C14 dates on burnt mound pit/trough: 2880-2570 cal BC (4127 ± 29 BP; SUERC-46826), hazel charcoal 2550-2340 …		Challinor et al. 2014; Kenney 2014	Challinor, D., Giorgi, J. and Rackham, J. 2014. Analaysis of charcoal and charred plant remains, pp. 42–79, in R. Bale, M.R. Bates, K. Cootes, J.A. Giorgi, J. Goodwin, F. Grant, D. Hamilton, D. Jenkins, R.I. Macphail, J.I. McKinley, N. Nayling, J. Rackham, G. Smith and T. Young, Gas Pipeline Replacement: Pwllheli to Blaenau Ffestiniog. Report on archaeological mitigation Volume II: specialist rep…	Kenney, J. 2014. Gas Pipeline Replacement: Pwllheli to Blaenau Ffestiniog. Report on archaeological mitigation. Volume 1. Unpublished Report. Gwynedd Archaeological Trust Report 1136.
Pysgodlyn Farm	79	Central	51.9642	-3.42589	Early Neolithic	Pottery	4	Pit Group	Pits	No	No	2007	n/a	Charred plant remains (abundant). Hazel nutshell ++++ Cereal grains +++ (indet cereal, wheat, emmer/spelt wheat) Cereal chaff (+) (wheat)	Excavated as part of South Wales high pressure gas pipeline scheme. Probable Early Neolithic pottery present.		Rackham 2013	Rackham, J. 2013. The palaeoenvironmental evidence, pp. 12-13 in P. Busby. South Wales Gas Pipeline Project. Site 51.02. Archaeological Watching Brief. Unpublished Report. Cotswold Archaeology Report 13330.
Steynton	80	South-West	51.7344	-5.02671	Late Neolithic	Pottery; C14	2	Pit Group	Pits	No	No	2006	n/a	Charred plant remains (abundant). Hazel nutshell ++++ Cereal grains (+) (indet cereal, barley) Fruit stone/Prunus sp (+)	Excavated as part of South Wales high pressure gas pipeline scheme. Two C14 dates on one pit (contains cereal grain): 2890-2660 cal BC (4185 ± 29 BP; SUERC-54661), hazel nutshell 2570-2450 cal BC (3966 ± 29 BP; SUERC-54662), hazel charcoal Two C14 dates on one pit (contains cereal grain): 2880-2570 cal BC (4138 ± 29 BP; SUERC-54659), hazel charcoal 2880-2570 cal BC (4120 ± 29 BP; SUERC-54660), ha…		Rackham 2014	Rackham, J. 2014. The palaeoenvironmental evidence, pp.61-74 in J. Hart, A. Barber and C. Leonard. South Wales Gas Pipeline Project Site 513. Archaeological Excavation. Unpublished Report. Cotswold Archaeology Report 13261.
Trecastle	81	Central	51.9493	-3.66187	Late Neolithic-Early Bronze Age (Beaker period)	C14	1	Ring Ditch	Ditch fills; Pits	No	No	2007	n/a	Charred plant remains (trace). Weed seeds and other (+)	Excavated as part of South Wales high pressure gas pipeline scheme. Ring ditch and associated pits excavated. One pit contained a copper halberd. Evidence for activity in the Early and Middle-Late Bronze Age also. One C14 date from ring ditch fill: 2460-2200 cal BC (3844 ± 27 BP; SUERC-52593), birch charcoal Three C14 dates from pit in centre of ring-ditch: 2470-2210 cal BC (3870 ± 24 BP; SUERC-5…		Rackham 2014	Rackham, J. 2014. Appendix D: The Palaeoenvironmental Evidence, pp. 31–43 in J. Hart. South Wales Gas Pipeline Project. Site 38.17. Archaeological Excavation. Unpublished Report. Cotswold Archaeology Report 13315.
Trelystan I	82	Central	52.6559	-3.06968	Late Neolithic	Pottery; C14	3	LNeo Structure and Pits	LNeo structure (post-holes, layers); Pits	Yes	Yes	1979	1982	Charred plant remains (rare). hazel nutshell Crab apple (+) Raspberry (+) Weed seeds and other +	Two dates from pit in structure: 3090-2630 cal BC (4260 ± 70 BP; CAR-272), charcoal (either hazel or rowan) 2890-2500 cal BC (4135 ± 65 BP; CAR-273), charcoal (either hazel, hawthorn-type or rowan) One date from central hearth: 2850-2290 cal BC (3985 ± 70 BP; CAR-274), hazel nutshell (combined sample)		Hillman 1982	Hillman, G. 1982. Appendix 6: Charred remains of plant, pp. 198–200 in W.J. Britnell, The Excavation of Two Round Barrows at Trelystan, Powys. Proceedings of the Prehistoric Society 48, 133–201.
Upper Neeston	83	South-West	51.7256	-5.06958	Early Neolithic	Pottery; C14	2	Pit Group	Ditch fills; Pits	No	No	2006	n/a	Charred plant remains abundant. Hazel nutshell ++++	Excavated as part of South Wales high pressure gas pipeline scheme. Early Neolithic pottery present. Two C14 dates from one pit (contains cereal assemblage): 3780-3640 cal BC (SUERC-54698; 4925 ± 29 BP), hazel nutshell 3760-3640 cal BC (SUERC-54699; 4910 ± 29 BP), hazel nutshell		Rackham 2014	Rackham, J. 2014. The palaeoenvironmental evidence, pp. 50–70 in A. Barber and J. Hart. South Wales Gas Pipeline Project. Site 511/514. Land South-East of Upper Neeston, Herbrandon, Pembrokeshire. Unpublished Report. Cotswold Archaeology Report 13254.
Upper Ninepence (1)	84	Central	52.2453	-3.09815	Middle Neolithic	Pottery; C14	3	Pit Groups	Pits	Yes	Yes	1994	1999	Charred plant remains (abundant). Hazel nutshell ++++ Cereal grains (+) (indet cereal, wheat, emmer wheat) Cereal chaff + (wheat, emmer wheat, emmer/spelt wheat, naked wheat) Weed seeds and other ++	Possibility that some material is intrusive. Five C14 dates obtained on individual pits: 3330-2900 cal BC (4400 ± 50 BP; BM-2967), charcoal (mixed) 3330-2910 cal BC (4410 ± 35 BP; BM-2966), charcoal (mixed) 3360-2920 cal BC (4470 ± 80 BP; SWAN-23), charcoal (mixed) 3520-3090 cal BC (4590 ± 60 BP; BM-3071), hazel charcoal 3370-2940 cal BC (4490 ± 60 BP; BM-3070), hawthorn-type charcoal Peterboroug…		Caseldine 1999	Caseldine, A.E. 1999. The charred plant remains from Walton. In A. Gibson (ed.) The Walton Basin Project: Excavation and Survey in a Prehistoric Landscape 1993–7 , 141–50. York: Council for British Archaeology Research Report 118.
Upper Ninepence (2)	85	Central	52.2453	-3.09815	Late Neolithic	Pottery; C14	3	LNeo Structure and Pits	Post Hole(s) (settlement); Pits; Hearths	Yes	Yes	1994	1999	Charred plant remains (abundant). Hazel nutshell ++++ Cereal grains (+) (indet cereal) Cereal chaff (+) (emmer/spelt) Bramble (+) Acorn (+) Weed seeds and other +++	One C14 date on hearth associated with structure: 3030-2610 cal BC (4240 ± 70 BP; SWAN-24), charcoal Three C14 dates on pits: 2880-2620 cal BC (4160 ± 35 BP; BM-2968), charcoal (mixed) 2840-2470 cal BC (4050 ± 35 BP; BM-2969), charcoal (mixed) 2860-2470 cal BC (4060 ± 40 BP; BM-3069), charcoal (mixed)		Caseldine 1999	Caseldine, A.E. 1999. The charred plant remains from Walton. In A. Gibson (ed.) The Walton Basin Project: Excavation and Survey in a Prehistoric Landscape 1993–7 , 141–50. York: Council for British Archaeology Research Report 118.
Upper Ninepence (3)	86	Central	52.2453	-3.09815	Late Neolithic	Pottery; C14	3	Barrow?	Stake-holes; Pits	Yes	Yes	1994	1999	Charred plant remains (common). Hazel nutshell +++ Cereal chaff (+) (emmer/einkorn, cf. bread wheat, wheat) Bramble (+) Hawthorn (+) Weed seeds and other +	One C14 date on stake-hole forming structure: 2920-2490 cal BC (4170 ± 80 BP; SWAN-25), charcoal (mixed)	Stake-circle, probably associated with barrow. Situated in proximity to two, smaller structures containing Grooved Ware (see Upper Ninepence (2)). Cereal chaff only present in 2 features which are possibly associated with the stake-circle.	Caseldine 1999	Caseldine, A.E. 1999. The charred plant remains from Walton. In A. Gibson (ed.) The Walton Basin Project: Excavation and Survey in a Prehistoric Landscape 1993–7 , 141–50. York: Council for British Archaeology Research Report 118.
Vaynor Farm	87	South-West	51.7985	-4.54248	Late Neolithic-Early Bronze Age (Beaker period)	C14	2	Pit	Pit	No	No	2006	n/a	No charred plant remains recovered.	Excavated as part of South Wales high pressure gas pipeline scheme. One C14 date on pit: 2570-2340 cal BC (3942 ± 30 BP; SUERC-55523), Prunus sp charcoal Feature possibly associated with adjacent pits and the nearby site of Vaynor Henge.		Rackham, J. 2013	Rackham, J. 2013. Appendix C: The Palaeoenvironmental Evidence, pp. 16–33 in J. Hart and C. Leonard. South Wales Gas Pipeline Project. Sites 222 and 233. Archaeological Watching Brief. Unpublished Report. Cotswold Archaeology Report 13176.
Vaynor Henge	88	South-West	51.7989	-4.54366	Late Neolithic-Early Bronze Age (Beaker period)	C14	2	Henge	Ditch fills	No	No	2006	n/a	Charred plant remains (occasional). Hazel nutshell ++ Acorn (+) Bramble (+) Weed seeds and other +	Excavated as part of South Wales high pressure gas pipeline scheme. Comprehensive C14 dating programme. Earliest C14 dates are Late Neolithic-Early Bronze Age (Beaker period). The lowest fills of the henge ditches appear to date to the Late Neolithic-Early Bronze Age (Beaker period), whilst later fills date to the Early Bronze Age, Late Bronze Age and Roman period. Some residual material incorpor…		Rackham 2013	Rackham, J. 2015. The palaeoenvironmental evidence, pp. 30–73 in A. Barber and J. Hart. South Wales gas pipeline project. Site 503. Land east of Vaynor Farm, Llanddowror, Camarthenshire. Archaeological Excavation. Unpublished Report. Cotswold Archaeology Report 9150.
Walton Court Farm	89	Central	52.2327	-3.0962	Late Neolithic-Early Bronze Age (Beaker period)	C14	4	Ring Ditch	Ditch fill(s)	Yes	Yes	2009-2010	2012	Charred plant remains (rare). Weed seeds and other +	One C14 date from ditch-fill: 2570-2300 cal BC (3945 ± 35 BP; SUERC-26430), hazel charcoal Difficult to phase samples for charred plant remains.		Caseldine et al. 2012	Caseldine, A.E., Griffiths, C.J. & Bale, R.J. 2012. Charred plant remains and charcoal identifications from trial excavations on large ring-ditches, pp. 183–9 in W.J. Britnell and N.W. Jones, Large late Neolithic and early Bronze Age ring-ditches in Wales. Archaeologia Cambrensis 161, 165–98.
Walton Palisaded Enclosure	90	Central	52.2319	-3.09445	Late Neolithic-Early Bronze Age (Beaker period)	C14	2	Palisaded Enclosure	Post Holes/Post-Pipes (monument); Palisade Trench	Yes	Yes	2010	2017	No charred plant remains recovered.	One C14 date from fill of post-ramp: 2570-2290 cal BC (3930 ± 35 BP; SUERC-32383), hazel charcoal One C14 date from fill of post-pit: 2840-2480 cal BC (4055 ± 30 BP; SUERC-32384), oak charcoal		Caseldine et al. 2017	Jones, N.W. & Gibson, A.M. 2017. Neolithic palisaded enclosures of Radnorshire’s Walton Basin. Archaeologia Cambrensis 166, 33–88
Waun Llanfair	91	North-West	53.2465	-3.85785	Late Neolithic-Early Bronze Age (Beaker period)	C14	3	Cairn	Buried Soil (Occupation Surface?)	Yes	Yes	2004, 2006	2017	Charred plant remains (abundant). Cairn 485, charred plant remains (trace). Hazel nutshell (+) Cairn 470, charred plant remains (abundant). Hazel nutshell ++++ Weed seeds and other +	Two ?contemporary cairns combined together. One C14 date on buried soil/?occupation layer (cairn 485): 2880-2570 cal BC (4116 ± 40 BP; SUERC-55966), hazel charcoal One C14 date from cairn matrix (cairn 470): 2870-2570 cal BC (4115 ± 30 BP; SUERC-27869), birch charcoal One C14 date from buried soil/occupation layer (cairn 470): 2870-2570 cal BC (4111 ± 30 BP; SUERC-27871), hazelcharcoal Two C14 da…		Caseldine and Griffiths 2017	Caseldine, A.E. & Griffiths, C.J. 2017. Palaeo-environmental evidence from Waun Llanfair, pp. 106–29 in A.E. Caseldine, C.J. Griffiths, J.G. Roberts, G. Smith & J.L. Williams, Land use and environmental history of Waun Llanfair, an upland landscape above Penmaenmawr, North Wales. Archaeologia Cambrensis 166, 89–140.
Westfields	92	South-West	51.743	-4.98339	Late Neolithic	C14	2	Pit Group	Pits	No	No	2006	n/a	Charred plant remains (abundant). Hazel nutshell ++++ Acorn + Weed seeds and other +	Excavated as part of South Wales high pressure gas pipeline scheme. Two C14 dates obtained on two pits: 2830-2470 cal BC (4034 ± 30 BP; SUERC-57286), hazel nutshell (x6) 2860-2470 cal BC (4079 ± 30 BP; SUERC-57287), hazel nutshell		Rackham 2013	Rackham, J. 2013. The palaeoenvironmental evidence, pp. 12–15 in C. Leonard. South Wales Gas Pipeline Project. Site 272. Land West of Westfields, Rosemarket, Pembrokeshire. Archaeological Watching Brief. Unpublished Report. Cotswold Archaeology Report 1321
Wiston	93	South-West	51.8219	-4.87323	Early Neolithic	Pottery	4	Pit Group	Pits	No	No	2006	n/a	Charred plant remains (abundant). Hazel nutshell ++++ Cereal grains ++ (indet cereal, barley, oat, emmer/spelt wheat) Cereal chaff (+) (emmer/einkorn wheat) Weed seeds and other (+)	Excavated as part of South Wales high pressure gas pipeline scheme. Early Neolithic pottery present (c.3800-3400 cal BC).		Rackham 2014	Rackham, J. 2014. The palaeoenvironmental evidence, pp. 17–21 in J. Hart and P. Busby, South Wales Gas Pipeline Project. Sites 245 and 253. Archaeological Watching Brief. Unpublished Report. Cotswold Archaeology Report 13201.
Womaston Causewayed Enclosure	94	Central	52.2417	-3.07609	Early Neolithic	Pottery; C14	2	Causewayed Enclosure	Ditch fill(s)	Yes	Yes	2008	2009	Charred plant remains (occasional). Hazel nutshell (+) Cereal grain (+) (indet cereal) Weed seeds and other ++	Two C14 dates from inner ditch: 3660-3380 cal BC (4800 ± 40 BP; Beta-254592), hazel charcoal (ditch re-cut) 3620-3360 cal BC (4660 ± 40 BP; Beta-254593), hazel charcoal (basal fill) Cereal grain present in C14 dated context (Beta-254593) One C14 date from outer ditch: 3620-3340 cal BC (4630 ± 40 BP; Beta-254954), hazel charcoal (ditch re-cut) Early Neolithic pottery also present.		Caseldine and Griffiths 2009	Caseldine, A.E. and Griffiths, C.J. 2009. Charcoal and charred plant remains, pp. 31–4 in N.W. Jones, Womaston Neolithic causewayed enclosure, Powys: survey and excavation 2008. Archaeologia Cambrensis 158, 19–42.
Ysgol yr Hendre	95	North-West	53.1364	Early Neolithic	Late Neolithic-Early Bronze Age (Beaker period)	C14	2	Pit	Pit	Yes	No	2010-2011	2012	Charred plant remains (abundant). Hazel nutshell ++++ Weed seeds and other (+)	Two C14 dates on pit: 2570-2340 cal BC (3946 ± 25 BP; SUERC-41947), hazel nutshell 2840-2495 cal BC (4075 ± 22 BP; SUERC-41951), hazel charcoal		Kenney and Parry 2012; McKenna 2013	McKenna, R. 2013. Appendix III.7. An assessment of the palaeoenvironmental potential, in J. Kenney & L.W. Parry, Ysgol yr Hendre, Llanbeblig, Caernarfon: Report on Archaeological Excavations. Unpublished Report. Gwynedd Archaeological Trust Report 1103.	Kenney, J. and Parry, L. 2012. Excavations at Ysgol yr Hendre, Llanbeblig, Caernarfon: a possible construction camp for Segontium fort and early medieval cemetery. Archaeologia Cambrensis 161, 249–84
Excluded sites due to poor dating evidence
Site Name	Site Number	Area	Latitude	Longitude	Period	Dating Evidence	Quality of Dating Evidence	Site Type	Feature Type(s) Sampled	Site Report Published	Archaeobotanical Report Published	Excavation Date	Publication Date	Summary of plant remains present	Comments	Comments2	Reference(s)	Full Reference (I)	Full Reference (II)	Full Reference (III)
Capel Eithin (1)		North-West	53.2298	-4.26511	Later Mesolithic-Early Neolithic?	C14	5	Pit Group	Pits	Yes	No	1978; 1980-1981	1999	Charred plant remains present.	?Mesolithic C14 dates obtained. Unclear if this is the real date of the samples of whether it reflects a problem with sample selection for C14 dating.		Williams 1999; Site Archive	Williams, D. 1999. Plant macrofossils, pp. 109–12 in S.I. White & G. Smith, A Funerary and Ceremonial Centre at Capel Eithin, Gaerwen, Anglesey: Excavations of Neolithic, Bronze Age, Roman and Early Medieval Features in 1980 and 1981. Transactions of the Anglesey Antiquarian Society (no Vol. no), 1–179.	Gwynedd Museum & Art Gallery, Site Archive.
Dyffryn Lane Cursus	n.a.	Central	52.6051	52.6051	Early Neolithic	C14	5	Cursus Monument	Ditch fill(s)	No	No	2009	n/a	Charred plant remains (trace). hazel nutshell (+)	Three C14 dates obtained on different contexts in ditch-fills: 3960-3770 cal BC (5060 ± 35 BP; SUERC-26897), hazel nutshell 3660-3380 cal BC (4800 ± 40 BP; Beta-263746), hazel charcoal 1040-1220 cal AD (895 ± 30 BP; SUERC-26901), hazel nutshell One date (SUERC-26901) is considered intrusive.		Jones 2009	Jones, N.W. 2009. Keel Berriew Pipeline. Archaeological Watching Brief. Unpublished Report. Clwyd Powys Archaeological Trust Report 1006.
Norton	n.a.	South-East	51.4694	-3.62121	Early Neolithic?	C14	5	Causewayed Enclosure	Ditch fill(s)?	No	No	2006-2007	n/a	Charred plant remains (rare). Hazel nutshell (+) Cereal grains + (wheat, indet cereal) Weed seed and other + *hazel nutshell and cereal grain intrusive	C14 dating indicated early medieval date for hazel nutshell and post-medieval date for cereal grain. Possible that plant remains come from pit rather than causewayed enclosure ditch (Davis and Sharples 2017:19-20).		Lewis and Huckfield 2009	Lewis, R. & Huckfield, P. 2009. Trial Excavations at the Norton Causewayed Enclosure and Church Farm Barrow Cemetery. Post-Excavation Analysis and Report. Unpublished Report. Glamorgan Gwent Archaeological Trust Report 2008/027	Davis, O. and Sharples, N. 2017. Early Neolithic enclosures in Wales: a review of the evidence in light of recent discoveries at Caerau, Cardiff. Antiquaries Journal 97, 1–26.
Snail Cave Rockshelter (2)	n.a.	North-East	53.3361	-3.83261	Early Neolithic?	C14	5	Rock shelter	Occupation Layers	Yes	Yes	2011	2014	Charred plant remains (abundant). Hazel nutshell ++++ Cereal grains (+) (indet cereal) Cereal chaff (+) (indet cereal) Weed seeds and other (+)	Archaeobotanical evidence potentially Early Neolithic in date. Evidence for mixing of deposits (intrusive Neolithic material and residual Mesolithic material). Two ENeo C14 dates obtained on winkle shells (layer contains cereal assemblage): 3840-3640 cal BC (5334 ± 29 BP; SUERC-45179), winkle shell 3730-3560 cal BC (5232 ± 29 BP; SUERC-45175), winkle shell One ENeo-MNeo C14 date was obtained an i…		McKenna 2014	McKenna, R. 2014. Palaeobotanical evidence, pp. 120–1 in G. Smith & E. Walker, Snail Cave rock shelter, North Wales: a new prehistoric site. Archaeologia Cambrensis 163, 99–131.
Capel Eithin (2)	n.a.	North-West	53.2298	-4.26511	Middle Neolithic?	Pottery; C14	5	Pit Group?	Pits	Yes	No	1978; 1980-1981	1999	Charred plant remains present.	Dating of features unclear and with probable evidence for mixing of deposits.		Williams 1999; Site Archive	Williams, D. 1999. Plant macrofossils, pp.109–12 in S.I. White & G. Smith, A Funerary and Ceremonial Centre at Capel Eithin, Gaerwen, Anglesey: Excavations of Neolithic, Bronze Age, Roman and Early Medieval Features in 1980 and 1981. Transactions of the Anglesey Antiquarian Society (no Vol. no), 1–179.	Gwynedd Museum & Art Gallery, Site Archive.
Causeway Lane	n.a.	Central	52.7782	-3.10826	Middle Neolithic?	C14	5	Ring Ditch	Ditch fill(s)	Yes	Yes	2010	2012	Charred plant remains (abundant). Hazel nutshell + Weed seeds and other ++++	C14 dating indicates mixing of deposits. Two C14 dates from primary ditch fills: 3960-3790 cal BC (5066 ± 29 BP; SUERC-43274), blackthorn charcoal 3350-3030 cal BC (4483 ± 29 BP; SUERC-43275), hazel charcoal One C14 date from secondary ditch fill: 8700-8470 cal BC (9323 ± 28 BP; SUERC-43276), hazel charcoal		Caseldine et al. 2012	Caseldine, A.E., Griffiths, C.J. & Bale, R.J. 2012. Charred plant remains and charcoal identifications from trial excavations on large ring-ditches, pp.183–9 in W.J. Britnell & N.W. Jones, Large late Neolithic and early Bronze Age ring-ditches in Wales. Archaeologia Cambrensis 161, 165–98.
Capel Eithin (4)	n.a.	North-West	53.2298	-4.26511	Late Neolithic-Early Bronze Age (Beaker period)?	Pottery; C14	5	Pits	Pits	Yes	No	1978; 1980-1981	1999	Charred plant remains present.	Dating of features unclear and with probable evidence for mixing of deposits.		Williams 1999; Site Archive	Williams, D. 1999. Plant macrofossils, pp.109–12 in S.I. White & G. Smith, A Funerary and Ceremonial Centre at Capel Eithin, Gaerwen, Anglesey: Excavations of Neolithic, Bronze Age, Roman and Early Medieval Features in 1980 and 1981. Transactions of the Anglesey Antiquarian Society (no Vol. no), 1–179.	Gwynedd Museum & Art Gallery, Site Archive.
Cromlech Farm	n.a.	North-West	53.3993	-4.46756	Late Neolithic-Early Bronze Age (Beaker period)	Pottery; C14	5	Chambered Tomb	Buried Soil/Occupation Layer	Yes	Yes	2008	2013	Charred plant remains (rare). C14 dated context: Weeds seeds and other (+) Old land surface (uncertain date): Hazel nutshell + Cereal grain (+) (oat) Weed seeds and other +	One C14 date on context containing Beaker pottery: 2350-2040 cal BC (3780 ± 40 BP; Beta-254971), hazel charcoal Cereal and weed seed rich Early Medieval context identified.		Caseldine and Griffiths 2013	Caseldine, A.E. & Griffiths, C.J. 2013.Charred plant remains, pp. 64–7 in G. Smith, Llanfechell: A Prehistoric funerary and ritual landscape in North Anglesey. Transactions of the Anglesey Antiquarian Society 2013, 51–88.
Key:
Symbol	Quantity
(+)	1-5
+	6-20
++	21-50
+++	51-100
++++	>100
Quality of Dating Evidence:
	1	Very Secure/Very good
	2	Secure/Good
	3	Moderate
	4	Poor
	5	Very poor
Common and Scientific names for plants listed in Supplementary Data Table 1 (following Stace 2010)
Common Name	Scientific Name
Indet. Cereal	Cerealia indet.
Wheat	Triticum sp.
Naked wheat	Triticum aestivum L. /T. durum Desf. /T. turgidum L.
Bread wheat	Triticum aestivum L.
Emmer wheat	Triticum dicoccum L.
Emmer/Spelt Wheat	Triticum dicoccum L./ T. spelta L.
Emmer/Einkorn Wheat	Triticum dicoccum L./ T. monococcum L
Barley	Hordeum sp.
Hulled Barley	Hordeum vulgare L. hulled
Naked Barley	Hordeum vulgare L. naked
Oat	Avena sp.
Rye	Secale cereale L.
Celtic bean	Vicia faba L.
Raspberry	Rubus idaeus L.
Blackberry	Rubus fruticosus L. agg.
Raspberry/Blackberry	Rubus idaeus L./ R. fruticosus L. agg.
Brambles	Rubus sp.
Crab Apple	Malus sylvestris L. Mill.
Acorn	Quercus sp.
Sloe	Prunus spinosa L.
Elder	Sambucus nigra L.
Hawthorn	Crataegus monogyna Jacq.
Hazelnut	Corylus avellana L.
Common Nettle	Urtica dioica L.
Sedges	Cyperaceae
Docks	Rumex sp.
Marsh Woundwort	Stachys palustris L.

## Sheet: Supplementary Data Table S2
Site Number	Site Name	Period	Number of Samples	Hazelnut Shell	Wild Fruits/Nuts	Cereal Grains	Cereal Chaff	Other Crops	Weed Seeds and Other
1	Berry Hill	Middle-Late Neolithic	-
2	Bolton Hill Quarry (1)	Late Mesolithic-Early Neolithic	-
3	Bolton Hill Quarry (2)	Early Neolithic	-
4	Bolton Hill Quarry (3)	Middle Neolithic	-	+++					+
5	Bolton Hill Quarry (4)	Late Neolithic-Early Bronze Age	-			(+)			+
6	Bolton Hill Quarry (5)	Late Neolithic-Early Bronze Age	-	(+)					+
7	Borras Quarry (1)	Early Neolithic	+	++++	(+)	++			(+)
8	Borras Quarry (2)	Middle Neolithic	+	++++					+
9	Bryn Bachau	Late Neolithic-Early Bronze Age	-
10	Buttington Cross	Late Neolithic-Early Bronze Age	(+)	++++		+	(+)	(+)
11	Capel Eithin (3)	Late Neolithic	+	P	(+)	++++	(+)	(+)	++
12	Carrog (1)	Early Neolithic	+	++++		++	(+)		++
13	Carrog (2)	Middle Neolithic	(+)	+++					+
14	Cefn Du (1)	Late Mesolithic-Early Neolithic	+
15	Cefn Du (2)	Middle-Late Neolithic	+	P			(+)
16	Church Farm Barrow	Late Neolithic-Early Bronze Age	-	(+)					(+)
17	Cilsan Mill	Late Neolithic	-	++++
18	Corndon Hill	Late Neolithic	(+)	+					+
19	Cwm Meudwy (1)	Early Neolithic	+	++++		+++	(+)		++
20	Cwm Meudwy (2)	Middle Neolithic?	-	+		(+)
21	Cwm Meudwy (3)	Late Neolithic-Early Bronze Age	-	++++					(+)
22	Cwmifor	Early Neolithic	+	++++		++++	(+)		+
23	Dyffryn Lane (1)	Middle Neolithic	(+)	++++
24	Dyffryn Lane (2)	Late Neolithic	(+)						+
25	Fan	Early Neolithic	-	(+)		(+)			(+)
26	Felin Fulbrook	Late Neolithic-Early Bronze Age	n.d
27	Four Crosses	Late Neolithic?	-
28	Four Crosses Site 2	Late Neolithic-Early Bronze Age	-			(+)			(+)
29	Gelli-Wern Isaf	Early Neolithic	-	++++
30	Glan-rhŷd Bridge (1)	Late Neolithic	+	++
31	Glan-rhŷd Bridge (2)	Late Neolithic-Early Bronze Age	+	+
32	Gurrey Cottage	Early Neolithic	(+)	++++	+	(+)	(+)
33	Gwernvale	Early Neolithic	n.d	P	P	P			P
34	Hendre	Late Neolithic-Early Bronze Age	+	++++		(+)			(+)
35	Hindwell Cursus	Early Neolithic	+	(+)	(+)				++++
36	Hindwell Double Palisaded Enclosure	Late Neolithic-Early Bronze Age	(+)	(+)					(+)
37	Hindwell Palisaded Enclosure	Late Neolithic-Early Bronze Age	+		+				++++
38	Hirdre-Faig	Late Neolithic-Early Bronze Age	-	++++		+
39	Llandefaeolog	Early Neolithic	(+)	++++		++	(+)
40	Llandevenny (2)	Early Neolithic	n.d		++++				++++
41	Llanilar (1)	Middle Neolithic	(+)	++++		(+)
42	Llanilar (2)	Late Neolithic	(+)	++++		(+)
43	Lower Scoveston (1)	Early Neolithic	-	+
44	Lower Scoveston (2)	Middle Neolithic	-	++++
45	Maescar	Late Neolithic	(+)	++++					(+)
46	Meusydd (1)	Middle-Late Neolithic	(+)						+
47	Meusydd (2)	Late Neolithic-Early Bronze Age	(+)						++++
48	Middle Bastleford (1)	Early Neolithic	(+)	++++	(+)	+		(+)?
49	Moel y Gerddi (1)	Middle Neolithic	-	(+)	(+)				+
50	Moel y Gerddi (2)	Late Neolithic	(+)						(+)
51	Mynydd Mwyn Farm	Middle-Late Neolithic	+	++++		+			+++
52	Nant Hall Road Site (2)	Late Mesolithic-Early Neolithic	n.d		P	(+)
53	Nant Hall Road Site (3)	Late Neolithic	n.d
54	Ogmore-by-Sea	Middle Neolithic	n.d	P	P	P		P
55	Pant-y-Butler	Middle Neolithic	(+)	++++					+
56	Pant-y-Ffin	Middle Neolithic	(+)	(+)
57	Parc Bryn Cegin (1)	Early Neolithic	+++	++++	(+)	+++	(+)		(+)
58	Parc Bryn Cegin (2)	Middle Neolithic	++	++++		(+)
59	Parc Bryn Cegin (3)	Middle Neolithic	-	(+)
60	Parc Bryn Cegin (4)	Late Neolithic	+	++++
61	Parc Bryn Cegin (5)	Late Neolithic-Early Bronze Age	+	+		(+)
62	Parc Cybi (1)	Early Neolithic	n.d	++++
63	Parc Cybi (2)	Middle Neolithic	n.d	++++
64	Parc Cybi (3)	Late Neolithic	n.d	++++
65	Parc y Wern	Early Neolithic	-	(+)
66	Penrhos Road (2)	Early Neolithic	-
67	Penrhos Road (3)	Middle Neolithic	-
68	Pentrehobin	Late Neolithic-Early Bronze Age	+		(+)				++
69	Pen-y-Banc	Middle Neolithic	-	++++
70	Pen-y-Crug	Early Neolithic	+	++++		++++	+
71	Penymynydd (1)	Early Neolithic	(+)
72	Penymynydd (2)	Middle Neolithic	(+)	P
73	Plas Gogerddan	Early Neolithic	(+)	++++	++++	++++	++++		(+)
74	Pwllheli to Blaenau Ffestiniog Pipeline Plot 6/21	Late Neolithic-Early Bronze Age	(+)	(+)
75	Pwllheli to Blaenau Ffestiniog Pipeline Plot 6/29.4	Late Neolithic	(+)
76	Pwllheli to Blaenau Ffestiniog Pipeline Plot 6/33 (1)	Late Neolithic-Early Bronze Age	+	(+)	(+)
77	Pwllheli to Blaenau Ffestiniog Pipeline Plot 6/33(2)	Late Neolithic-Early Bronze Age	-
78	Pwllheli to Blaenau Ffestiniog Pipeline Plot 6/6	Late Neolithic-Early Bronze Age	(+)	(+)
79	Pysgodlyn Farm	Early Neolithic	(+)	++++		+++	(+)
80	Steynton	Late Neolithic	(+)	++++	(+)	(+)
81	Trecastle	Late Neolithic-Early Bronze Age	+						(+)
82	Trelystan I	Late Neolithic	(+)	P	(+)				(+)
83	Upper Neeston	Early Neolithic	(+)	++++
84	Upper Ninepence (1)	Middle Neolithic	+	++++		(+)	+		++
85	Upper Ninepence (2)	Late Neolithic	++	++++	(+)	(+)	(+)		+++
86	Upper Ninepence (3)	Late Neolithic	+	+++	(+)		(+)		+
87	Vaynor Farm	Late Neolithic-Early Bronze Age	-
88	Vaynor Henge	Late Neolithic-Early Bronze Age	++	++	+				+
89	Walton Court Farm	Late Neolithic-Early Bronze Age	(+)						+
90	Walton Palisaded Enclosure	Late Neolithic-Early Bronze Age	(+)
91	Waun Llanfair	Late Neolithic-Early Bronze Age	(+)	++++					+
92	Westfields	Late Neolithic	+	++++	+				+
93	Wiston	Early Neolithic	+	++++		++	(+)		(+)
94	Womaston Causewayed Enclosure	Early Neolithic	(+)	(+)		(+)			++
95	Ysgol yr Hendre	Late Neolithic-Early Bronze Age	(+)	++++					(+)
	Key to abundance scale:
	Symbol	Quantity
	(+)	1-5
	+	6-20
	++	21-50
	+++	51-100
	++++	>100

## Sheet: Supplementary Data Table S3
Weed Species	Common Name	Habitat	Annual/Perennial	Early Neolithic contexts	Early Neolithic Sites	Middle Neolithic Contexts	Middle Neolithic Sites	Late Neolithic Contexts	Late Neolithic Sites		Site	Period	Vicia/Lathryus/Pisum sp.	Fallopia Convolvulus (L.) A. Love	Centaurea sp.	Polygonum aviculare L.	Bromus sp.	Caryophyllaceae	Plantago lanceolata L.	Persicaria maculosa/lapathifolia	Persicaria lapathifolia L.	Atriplex sp.	Rumex sp.	Rumex acetosella L.	Viola sp.	Trifolium sp.	Arrhenatherum elatius Var. bulbosum (Willld.) St Amans	Carex sp. Biconvex	Bromus sp.	Persicaria minor	Prunella vulgaris	Chenopodium sp.	Total
Atriplex sp.	Oraches	Disturbed	n.a	1	1						Middle Bastleford (Site 48)	Early Neolithic	1																				1
Persicaria lapathifolia L.	Pale persicaria	Disturbed	Annual	1	1						Cwmifor (Site 22)	Early Neolithic		4	1	1			1	1													8
Persicaria maculosa L. / P. lapathifolia L.	Redshank/Pale Persicaria	Disturbed	Annual	1	1						Carrog (Site 12)	Early Neolithic									2	1		1			2						6
Rumex acetosella L.	Sheep’s Sorrel	Disturbed/Grassland/Moorland	Perennial	1	1			1	1		Plas Gogerddan (Site 73)	Early Neolithic																		1			1
Arrhenatherum elatius Var. bulbosum (Willd.) St Amans	False-Oat grass	Disturbed/Grassland/Woodland Edge	Perennial	1	1						Cwm Meudwy (Site 19)	Early Neolithic																1					1
Fallopia convolvulus (L.) Á. Löve	Black-bindweed	Disturbed	Annual	4	1						Upper Ninepence (Site 84)	Middle Neolithic						1					1		1	1							4
Plantago lanceolata L.	Ribwort plantain	Grassland	Perennial	1	1						Capel Eithin (Site 11)	Late Neolithic				1	1						18	6							3	2	31
Polygonum aviculare L.	Knotgrass	Freshwater/Moorland	Annual	1	1			1	1
Carex sp. biconvex	Sedge	Freshwater/Moorland/Grassland	Perennial	1	1
Poaceae	Grass	Indet.	Annual	1	1	1	1
Centaurea sp.	Knapweed	Disturbed/Grassland	n.a.	1	1
Vicia/Lathyrus/Pisum sp.	Vetch/Tare/Vetchling/Pea	Indet.	Annual	1	1
Persicaria minor (Huds.) Opiz	Small Water-pepper	Freshwater/Moorland/Grassland	Annual	1	1
Caryophyllaceae	Pinks	Indet.	Indet.			1	1
Rumex sp.	Docks	Indet.	Perennial			1	1	2	1
Viloa sp.	Violets	Indet.	Indet.			1	1
Trifolium sp.	Clovers	Indet.	Indet.			1	1
Prunella vulgaris L.	Selfheal	Disturbed/Grassland/Woodland Edge	Perennial					2	1
Chenopodium sp.	Goosefoots	Indet.	Indet.					1	1
Habitat classifications following Stace (2010) and based on Bogaard and Jones (2007). Nomenclature follows Stace (2010).

## Sheet: Supplementary Data Table S4
Site	Site Number	Area	Latitude	Longitude	Period	Site Description	Radiocarbon Dating	Reference 1	Reference 2	Reference 3	Reference 4
Cwm Meudwy	19	South-West Wales	52.054	-4.33087	Early Neolithic	Early Neolithic occupation evidence, large number of pits over a wide area. Many of these pits were not dated, however, 11 pits were dated to the Early Neolithic by pottery evidence and radiocarbon dating. The pits were shallow and primarily consisted of a single charcoal-rich fill.	Three radiocarbon dates on separate pits. 3780-3520 cal BC (4870 ± 50 BP; Beta-185680), hazel charcoal. 3710-3520 cal BC (4840 ± 40 BP; Beta-185679), hazel charcoal. 3660-3380 cal BC (4800 ± 40 BP; Beta-185678), alder charcoal. A further Early Neolithic date is available for the site. However, the excavator's judge this date to be residual.	Murphy, K. and Evans, R.T.J. 2006. Excavation of Neolithic pits, three ring-ditches and a palisaded enclosure at Cwm Meudwy, Llandysul, Ceredigion, 2003. Archaeologia Cambrensis 155, 23–48.	Caseldine, A.E. and Griffiths, C.J. 2006. The charred plant remains, 42–43 in K. Murphy & R.T.J. Evans (eds), Excavation of Neolithic pits, three ring-ditches and a palisaded enclosure at Cwm Meudwy, Llandysul, Ceredigion, 2003. Archaeologia Cambrensis 155, 23–48.	Caseldine, A.E. and Griffiths, C.J. 2006. The Charred Plant Remains from Cwm Meudwy, Llandysul. Unpublished Report. Site Archive.
Gwernvale	33	Central Wales	51.8659	-3.14712	Early Neolithic	Early Neolithic occupation evidence, buried soil - "midden" - and rectangular structure. Preserved and sealed beneath a Cotswold-Severn tomb.	Date from pit associated with structure. 3980-3670 cal BC (5050 ± 80 BP; CAR-113), charcoal. Four Early Neolithic radiocarbon dates also obtained on cereal grains (Caseldine pers comm.)	Britnell, W.J. 1984. The Gwernvale Long Cairn, Crickhowell, Brecknock. In W.J. Britnell & H.N. Savory (ed.) Gwernvale and Penywyrlod: Two Neolithic Long Cairns in the Black Mountains of Brecknock, 43–154. Cardiff: Cambrian Archaeological Monograph 2	Dresser, Q. 1984. Radiocarbon dating, p. 152 in W.J. Britnell, The Gwernvale Long Cairn, Crickhowell, Brecknock, in W.J. Britnell and H.N. Savory (eds), Gwernvale and Penywyrlod: Two Neolithic Long Cairns in the Black Mountains of Brecknock, 43–154. Cardiff: Cambrian Archaeological Monograph 2	Hillman, G. in W.J. Britnell 1984. The Gwernvale Long Cairn, Crickhowell, Brecknock, in W.J. Britnell and H.N. Savory (eds), Gwernvale and Penywyrlod: Two Neolithic Long Cairns in the Black Mountains of Brecknock, 43–154. Cardiff: Cambrian Archaeological Monographs 2	A. Caseldine pers comm.
Parc Bryn Cegin	57	North-West Wales	53.2133	-4.10641	Early Neolithic	Early Neolithic occupation evidence, rectangular timber structure. Some features (pits) located outstide the structure are probably associated with it.	Fourteen radiocarbon determinations on charcoal and charred plant material. Bayesian modelling of the dates (assuming a single phase of activity) places the use of the building at approximately: 3800-3600 cal BC Three direct radiocarbon dates obtained on cereal grains.	Kenney, J. 2008. Recent Excavations at Parc Bryn Cegin, Llandygai, near Bangor, North Wales. Volume 1: The Text. Bangor: Gwynedd Archaeological Trust Report 764	Marshall, P. Kenney, J. Grootes, P.M., Hogg, A. and Prior, C. 2008. Appendix XVI: Radiocarbon dates. In J. Kenney, Recent Excavations at Llandygai, near Bangor, North Wales. Volume III: appendices, 186–204. Bangor: Gwynedd Archaeological Trust Report 764	Schmidl, A., Carrott, J. and Jaques, D. 2008. Appendix XIV: The Biological Remains. In J. Kenney, Recent Excavations at Llandygai, near Bangor, North Wales. Volume III: appendices, 122–82 . Bangor: Gwynedd Archaeological Trust Report 764
Plas Gogerddan	73	South-West Wales	52.4323	-4.02185	Early Neolithic	Early Neolithic occupation evidence, small pit identified during extensive excavation of a multi-period site. No finds recovered.	Date from pit fill 3640-3360 cal BC (4700 ± 70 BP; CAR-994), mixed wood charcoal.	Murphy, K. 1992. Plas Gogerddan, Dyfed: A Multi-Period Burial and Ritual Site. Archaeological Journal 149, 1–38.	Caseldine, A.E. 1992. The Neolithic carbonized plant remains from pit 206, 24–6 in K. Murphy, Plas Gogerddan, Dyfed: A Multi-Period Burial and Ritual Site. Archaeological Journal 149, 1–38

## Sheet: Supplementary Data 5
Site	Site Description	Feature Type	Feature Number	Context Number	Sample ID	Common Name	Latin Name	Preservation Score (following Hubbard and al Azm 1990)	Distortion Score (following Hubbard and al Azm 1990)	Cereal Grain Measurement X (mm)	Cereal Grain Measurement Y (mm)	Cereal Grain Measurement Z (mm)	C wt%	δ13C	Δ13C	N wt%	δ15N	Atomic C/N
Plas Gogerddan	Pit	Pit	206	205	NCI 003	Emmer wheat	Triticum dicoccum	3	2	5.6	3.1	2.5	46.9979	-24.2621	18.337	3.24606	-1.8771	16.8842
Plas Gogerddan		Pit	206	205	NCI 004	Emmer wheat	Triticum dicoccum	3	3	5.3	2.9	3	54.532	-25.0702	19.1811	3.69093	1.60445	17.2295
Plas Gogerddan		Pit	206	205	NCI 005	Emmer wheat	Triticum dicoccum	3	4	6	3.1	2.8	54.1484	-24.7893	18.8875	3.14631	3.34278	20.0698
Plas Gogerddan		Pit	206	205	NCI 006	Emmer wheat	Triticum dicoccum	3	2	6.1	3.2	2.8	50.8251	-23.6295	17.6772	3.04294	2.59667	19.4779
Plas Gogerddan		Pit	206	205	NCI 007	Emmer wheat	Triticum dicoccum	3	2	5.9	3	3	53.5251	-24.5861	18.6753	3.63124	-1.38978	17.1894
Plas Gogerddan		Pit	206	205	NCI 008	Emmer wheat	Triticum dicoccum	3	2	5.4	3	2.8	53.9438	-24.0589	18.125	3.83266	1.24506	16.4134
Plas Gogerddan		Pit	206	205	NCI 009	Emmer wheat	Triticum dicoccum	3	2	5.8	3.6	3	52.067	-25.0136	19.1219	2.92763	2.50389	20.7398
Plas Gogerddan		Pit	206	205	NCI 010	Emmer wheat	Triticum dicoccum	4	2	5.4	2.8	2.9	55.0795	-24.6657	18.7584	3.59864	-0.148533	17.8488
Plas Gogerddan		Pit	206	205	NCI 011	Emmer wheat	Triticum dicoccum	3	2	5.6	3	2.5	49.3072	-23.642	17.6902	3.26503	0.427656	17.6109
Plas Gogerddan		Pit	206	205	NCI 012	Emmer wheat	Triticum dicoccum	3	2	5.8	3	3	57.1566	-23.596	17.6422	3.44341	-1.96402	19.3569
Plas Gogerddan		Pit	206	205	NCI 013	Emmer wheat	Triticum dicoccum	3	2	5.1	2.9	2.7	52.6283	-23.8634	17.9211	3.50512	0.640553	17.5095
Plas Gogerddan		Pit	206	205	NCI 014	Emmer wheat	Triticum dicoccum	2	2	5.2	2.9	2.6	55.1736	-23.9324	17.993	3.16315	-1.23255	20.3409
Plas Gogerddan		Pit	206	205	NCI 015	Emmer wheat	Triticum dicoccum	3	2	5.7	2.8	2.6	53.5997	-24.7059	18.8004	3.52715	2.62596	17.7213
Plas Gogerddan		Pit	206	205	NCI 016	Emmer wheat	Triticum dicoccum	3	2	5	2.7	2.9	49.5984	-24.2669	18.342	2.92159	1.06049	19.7974
Plas Gogerddan		Pit	206	205	NCI 017	Emmer wheat	Triticum dicoccum	3	3	6.1	3	2.9	49.9377	-24.3868	18.4671	2.69376	-1.756	21.6186
Plas Gogerddan		Pit	206	205	NCI 018	Emmer wheat	Triticum dicoccum	3	2	5.6	3	2.6	52.1116	-23.942	18.003	3.59566	0.302652	16.9011
Plas Gogerddan		Pit	206	205	NCI 019	Emmer wheat	Triticum dicoccum	2	2	5.7	3.2	2.7	49.2127	-24.5718	18.6603	2.9161	2.38572	19.6803
Plas Gogerddan		Pit	206	205	NCI 020	Emmer wheat	Triticum dicoccum	4	2	5.7	3	2.9	48.9499	-25.2571	19.3765	2.50226	-1.29993	22.8128
Plas Gogerddan		Pit	206	205	NCI 021	Emmer wheat	Triticum dicoccum	3	2	5.7	3.1	2.7	57.4995	-23.9516	18.013	3.4484	1.70015	19.4449
Plas Gogerddan		Pit	206	205	NCI 022	Emmer wheat	Triticum dicoccum	2	2	5.7	3	2.8	55.3592	-25.6367	19.7736	2.87226	1.25678	22.4763
Plas Gogerddan		Pit	206	205	NCI 023	Emmer wheat	Triticum dicoccum	3	2	5.5	3.2	3.1	44.4347	-25.3971	19.5229	3.12606	3.3877	16.5761
Plas Gogerddan		Pit	206	205	NCI 024	Emmer wheat	Triticum dicoccum	2	2	5.6	2.8	2.9	52.1293	-25.4574	19.586	3.37033	-0.44151	18.0371
Plas Gogerddan		Pit	206	205	NCI 025	Emmer wheat	Triticum dicoccum	3	2	5.5	3	3	44.4679	-23.826	17.8821	2.6562	1.91793	19.5229
Plas Gogerddan		Pit	206	205	NCI 026	Emmer wheat	Triticum dicoccum	3	2	5	3	2.66	51.7423	-24.4874	18.5722	3.48556	1.22358	17.3114
Plas Gogerddan		Pit	206	205	NCI 027	Emmer wheat	Triticum dicoccum	3	2	5.2	2.9	2.7	44.6128	-23.5902	17.6363	3.20007	-0.033295	16.2577
Plas Gogerddan		Pit	206	205	NCI 028	Emmer wheat	Triticum dicoccum	3	2	5.1	2.8	2.6	51.8183	-24.104	18.172	3.71585	-2.21598	16.2623
Plas Gogerddan		Pit	206	205	NCI 029	Barley	Hordeum sp.	4	3	4.4	3.2	2.6	52.2085	-25.1028	19.2151	2.90527	-0.758902	20.9562
Plas Gogerddan		Pit	206	205	NCI 030	Barley	Hordeum sp.	3	2	6	3.2	2.6	50.6728	-24.5871	18.6763	3.43209	1.83688	17.2177
Cwm Meudwy B	Pit cluster	Pit	3052	50	NCI 031	Emmer wheat	Triticum cf. dicoccum	5	4	4..4	2.5	2.3	52.5194	-24.4577	18.5412	2.66866	1.55953	22.9501
Cwm Meudwy B		Pit	3052	50	NCI 032	Emmer wheat	Triticum cf. dicoccum	5	4	4.5	2.6	2.4	50.5373	-24.5047	18.5902	3.37728	2.97265	17.4503
Cwm Meudwy B		Pit	3052	50	NCI 033	Emmer wheat	Triticum cf. dicoccum	3	2	5	2.8	2.2	49.7735	-23.3228	17.3576	2.58205	-0.604601	22.4798
Cwm Meudwy B		Pit	3060	110	NCI 034	Barley	Hordeum sp.	5	4	3.4	2.4	1.9	49.1317	-25.8188	19.9643	2.25441	6.14267	25.4148
Cwm Meudwy B		Pit	3060	110	NCI 035	Emmer wheat	Triticum cf. dicoccum	5	3	4.8	2.6	2.5	53.6569	-25.1037	19.2161	2.58604	4.45707	24.1963
Cwm Meudwy B		Pit	3056	52	NCI 036	Emmer wheat	Triticum cf. dicoccum	3	2	5.1	2.9	2.5	47.4868	-23.2691	17.3017	3.39009	0.665944	16.3351
Cwm Meudwy B		Pit	3056	52	NCI 037	Emmer wheat	Triticum cf. dicoccum	4	3	4.6	2.8	2.9	46.528	-23.6276	17.6752	3.27382	-0.0411078	16.5736
Gwernvale	Midden/Occupation deposits and rectangular structure/house	Buried soil - "midden"	GV 78 30 Area 2/B	N.A.	NCI 038	Emmer wheat	Triticum cf. dicoccum	3	2	4.6	2.6	2.7	42.9693	-25.5878	19.7225	2.07514	2.6035	24.1473
Gwernvale		Buried soil - "midden"	GV 30 Area 33 Spit A, 1st Flot	N.A.	NCI 039	Emmer wheat	Triticum cf. dicoccum	3	2	4.9	2.6	2.1	48.4101	-25.2236	19.3414	2.16137	2.81347	26.1195
Gwernvale		Darker soil above buried soil - "midden"	GV 78/70 95 Area 8/A7	N.A.	NCI 040	Barley	Hordeum sp.	3	2	5	2.6	2.4	48.1632	-24.9063	19.0097	2.79269	1.55776	20.1
Gwernvale		Feature underlying buried soil - "midden"	GV 78 158	N.A.	NCI 041	Emmer wheat	Triticum cf. dicoccum	3	2	5	2.7	2.5	45.6445	-24.2784	18.354	2.06613	-1.14466	25.7625
Gwernvale		Buried soil - "midden"	GV 78 202 Area 3 Spit B, 202	N.A.	NCI 042	Emmer wheat	Triticum cf. dicoccum	3	2	4.1	2.6	2.1	38.4806	-25.8274	19.9733	1.55563	3.44532	28.8465
Gwernvale		Post-hole associated with rectangular structure	GV 78 208 Area B, 208, 1st Flot	N.A.	NCI 043	Emmer wheat	Triticum cf. dicoccum	3	2	5.6	3	2.8	52.5016	-24.2468	18.321	3.72407	2.72069	16.4404
Gwernvale		Buried soil - "midden"	GV 78 202 Area 8, Spit A	N.A.	NCI 044	Barley	Hordeum sp.	3	2	4.5	2.9	2.1	50.5899	-25.6467	19.7842	2.53981	4.92193	23.232
Gwernvale		Buried soil - "midden"	GV 78 202 Area 13 Spit A	N.A.	NCI 045	Emmer wheat	Triticum cf. dicoccum	3	2	4.9	3	2.7	47.7646	-25.2111	19.3284	2.55874	1.36811	21.769
Parc Bryn Cegin	Rectangular structure/house	Post-hole	1704	1708	NCI 046	Emmer wheat	Triticum dicoccum	3	3	5.2	3	2.6	48.5439	-22.8157	16.8297	3.17352	-0.168065	17.8382
Parc Bryn Cegin		Post-hole	1704	1708	NCI 047	Emmer wheat	Triticum dicoccum	4	2	5.7	3.1	3.1	49.0508	-23.5998	17.6462	4.65057	7.65248	12.2998
Parc Bryn Cegin		Pit	1729	1730	NCI 048	Emmer wheat	Triticum dicoccum	3	2	5.6	3.4	3	48.8627	-23.6659	17.7152	2.78131	0.396405	20.4874
Parc Bryn Cegin		Pit	1729	1730	NCI 049	Barley	Hordeum sp.	2	2	4.5	2.6	2.5	47.9603	-24.2909	18.3671	1.97249	0.384686	28.3547
Parc Bryn Cegin		Small pit/post-hole	1335	1336	NCI 050	Emmer wheat	Triticum dicoccum	2	2	4.7	2.6	2.3	51.5723	-23.9688	18.031	3.07717	1.21186	19.5445
Parc Bryn Cegin		Burnt Patch	1315	1314	NCI 051	Emmer wheat	Triticum dicoccum	3	2	5.4	2..9	2.9	48.288	-24.9398	19.0448	2.00145	-1.09876	28.1354
Parc Bryn Cegin		Pit	1249	1216	NCI 052	Emmer wheat	Triticum dicoccum	3	2	4.2	2.5	2.7	51.7113	-23.4541	17.4944	2.66592	2.37107	22.6202
Parc Bryn Cegin		Pit	1249	1216	NCI 053	Emmer wheat	Triticum dicoccum	4	2	4.5	2.5	2.4	45.7709	-24.7146	18.8094	2.7518	0.922788	19.3968
